# Supplementary material for: Protein Phosphorylation Alterations in Myotonic Dystrophy Type 1: A Systematic Review
Source: MDPI journal article supplement (doi:10.3390/ijms24043091), 2023-02-04
Supplement: s1 [file s1]

# Protein Phosphorylation Alterations in Myotonic Dystrophy Type 1: A Systematic Review

Adriana Costa, Ana C. Cruz, Filipa Martins \* and Sandra Rebelo \*

Institute of Biomedicine (iBiMED), Department of Medical Sciences, University of Aveiro, 3810-193 Aveiro, Portugal

\* Correspondence: samartins@ua.pt (F.M.); srebelo@ua.pt (S.R.)

## web of Question:

1. What is the impact of protein phosphorylation in myotonic dystrophy type 1?

## Search strategy

**PICO** (Population, Intervention, Comparison, Outcome) **framework**

**P=** ("Myotonic dystrophy type 1" OR "Congenital Myotonic dystrophy" OR "Dystrophia Myotonica 1" OR "Myotonic Dystrophy 1" OR "Steinert Syndrome" OR "Steinert's disease" OR "Steinert myotonic dystrophy" OR "Myotonic dystrophy of Steinert" OR "Steinert's congenital myotonic dystrophy")

**I=** not applicable

**C=** not applicable

**O=** ("protein phosphorylation" OR "Phosphorylation" OR "Protein Kinases" OR "Kinases" OR "Protein phosphatases" OR "Phosphatases" OR "Myotonic Dystrophy Protein Kinase" OR "DMPK" OR "Phosphoprotein" OR "Phosphotarget" OR "Protein subunits" OR "phosphopeptide" OR "proteomic")

## Databases

PubMed; Web of knowledge

**Typical Search** – performed in title, abstract and keywords (MESH terms in Pubmed)

**Search with MESH terms**

("Myotonic Dystrophy"[Mesh]) AND ("Phosphorylation/genetics"[Mesh] OR  
 "Phosphorylation/physiology"[Mesh] OR "Protein Kinases/genetics"[Mesh] OR "Protein  
 Kinases/metabolism"[Mesh] OR "Protein Kinases/physiology"[Mesh] OR "Phosphotransferases/genetics"[Mesh]  
 OR "Phosphotransferases/metabolism"[Mesh] OR "Phosphotransferases/physiology"[Mesh] OR  
 "Phosphoprotein phosphatases/genetics"[Mesh] OR "Phosphoprotein phosphatases/metabolism"[Mesh] OR  
 "Phosphoprotein phosphatases/physiology"[Mesh] OR "Myotonin-Protein Kinase/genetics"[Mesh] OR  
 "Myotonin-Protein Kinase/metabolism"[Mesh] OR "Myotonin-Protein Kinase/physiology"[Mesh] OR  
 "Myotonin-Protein Kinase/deficiency"[Mesh] OR "Protein subunits/genetics"[Mesh] OR "Protein  
 subunits/metabolism"[Mesh] OR "Protein subunits/physiology"[Mesh])

**MESH terms (Pubmed):**

Myotonic Dystrophy/  
 Phosphorylation/genetics  
 Phosphorylation/physiology  
 Protein Kinases/genetics  
 Protein Kinases/metabolism  
 Protein Kinases/physiology  
 Phosphotransferases/genetics  
 Phosphotransferases/metabolism  
 Phosphotransferases/physiology  
 Phosphoprotein phosphatases/genetics  
 Phosphoprotein phosphatases/metabolism  
 Phosphoprotein phosphatases/physiology  
 Myotonin-Protein Kinase/genetics  
 Myotonin-Protein Kinase/metabolism  
 Myotonin-Protein Kinase/physiology  
 Myotonin-Protein Kinase/deficiency  
 Protein subunits/genetics  
 Protein subunits/metabolism  
 Protein subunits/physiology

**Inclusion criteria**

- include animal models of myotonic dystrophy type 1
- Include cellular models of myotonic dystrophy type 1
- Include samples from patients with myotonic dystrophy type 1
- English language

**Exclusion criteria**

- studies involving proxy versions
- qualitative studies, news, research protocols, case studies, case reports, theses, dissertations, abstracts, letters to the editor, unpublished work, editorials, commentaries, books, book chapters, systematic reviews (references checked), guidelines, statements and position papers
