# Supplementary material for: Protein Phosphorylation Alterations in Myotonic Dystrophy Type 1: A Systematic Review
Source: MDPI journal article supplement (doi:10.3390/ijms24043091), 2023-02-04
Supplement: s1 [file s1]

## **Supplementary Figures 1-5**

### **Protein Phosphorylation Alterations in Myotonic Dystrophy Type 1: A Systematic Review**

**Adriana Costa <sup>1</sup>, Ana C. Cruz <sup>1</sup>, Filipa Martins <sup>1</sup> and Sandra Rebelo <sup>1,\*</sup>**

<sup>1</sup> Institute of Biomedicine (iBiMED), Department of Medical Sciences, University of Aveiro, 3810-193

Aveiro, Portugal

\* Correspondence: srebelo@ua.pt; Tel.: +351-924-406-306; Fax: +351-234-372-587

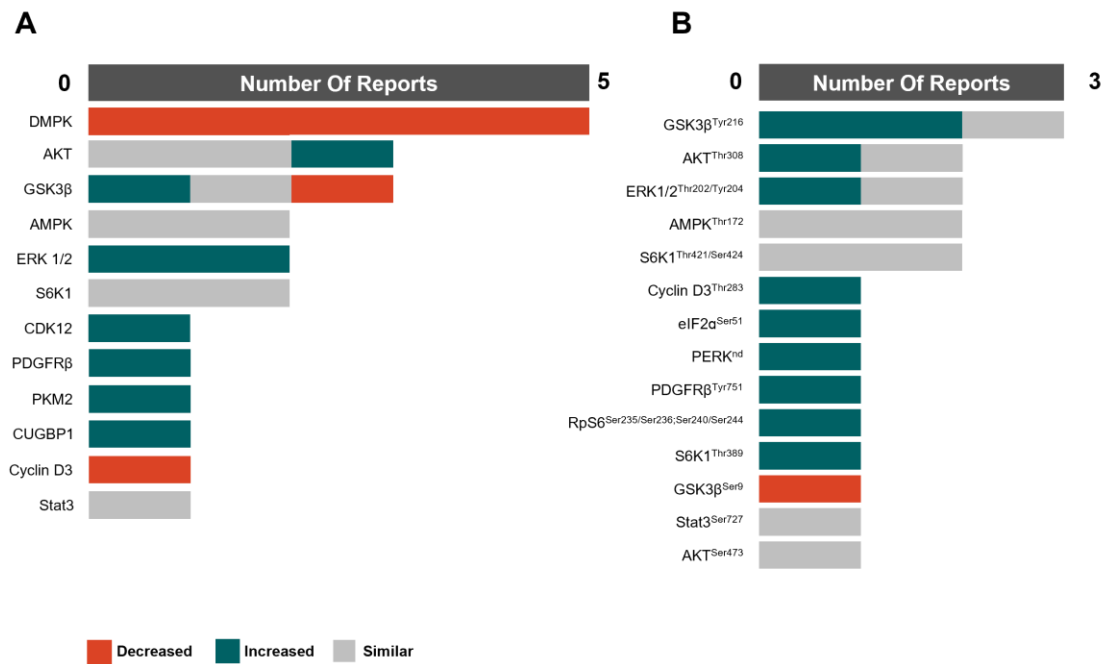

**Figure S1** – Status of total and phosphorylated kinase, phosphatase and phosphoprotein levels in DM1 in human skeletal muscle tissue biopsy. Values are represented as the number of times in which a protein presented increased, similar or decreased values in DM1 in comparison with the control levels reported in the articles. A) Total protein levels in human skeletal muscle tissue biopsy; B) Phosphorylated levels in human skeletal muscle tissue biopsy; nd- not defined

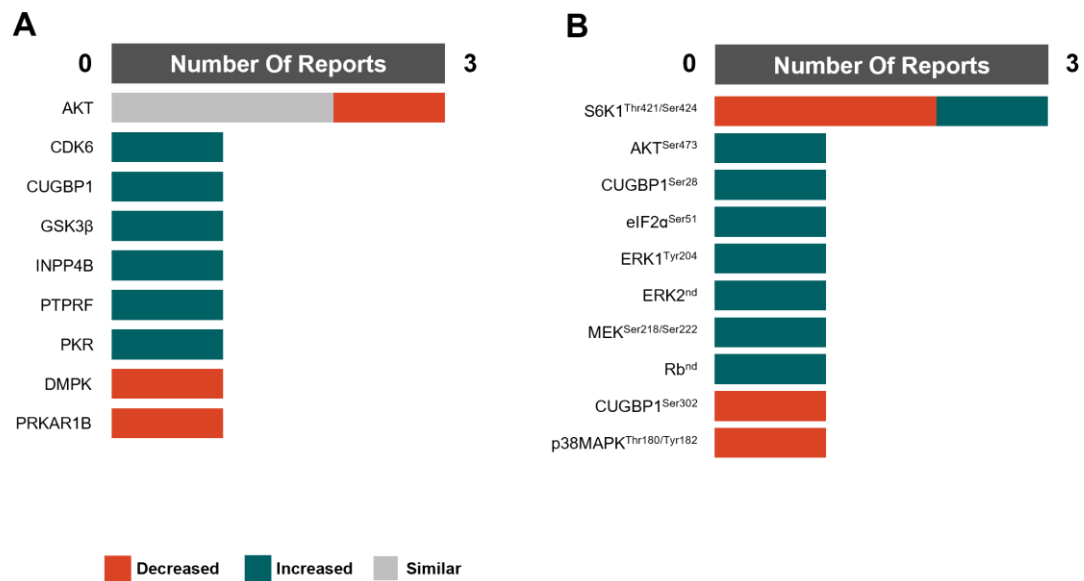

**Figure S2** – Status of total and phosphorylated kinase, phosphatase and phosphoprotein levels in DM1 in human myoblasts. Values are represented as the number of times in which a protein presented increased, similar or decreased values in DM1 in comparison with the control levels reported in the articles. A) Total protein levels in human myoblasts; B) Phosphorylated levels in human myoblasts; nd- not defined

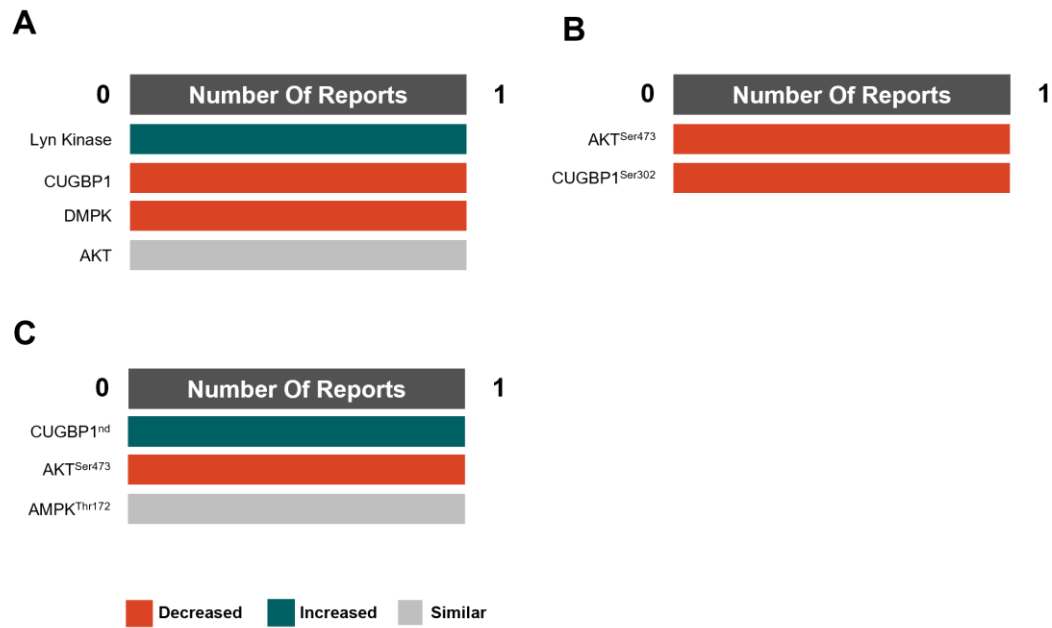

**Figure S3** – Status of total and phosphorylated kinase, phosphatase and phosphoprotein levels in DM1 in human myotubes and human fibroblast-derived myotubes. Values are represented as the number of times in which a protein presented increased, similar or decreased values in DM1 in comparison with the control levels reported in the articles. A) Total protein levels in human myotubes; B) Phosphorylated levels in human myotubes; C) Phosphorylated levels in human Fibroblast-derived myotubes. nd- not defined

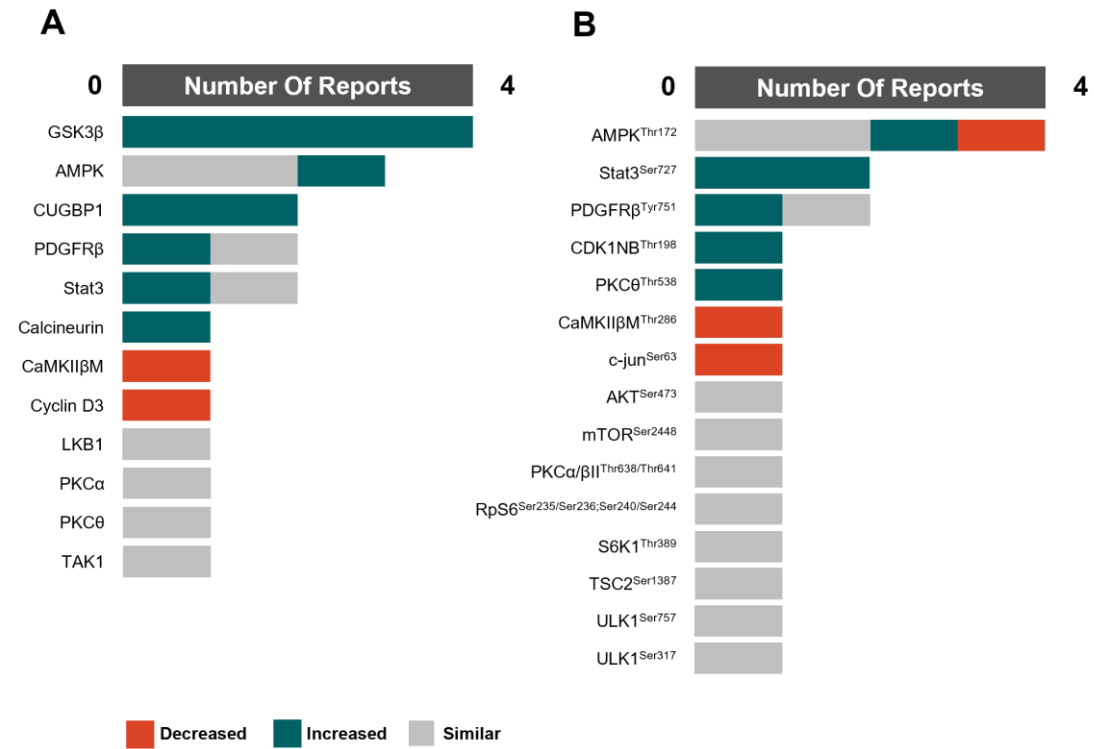

**Figure S4** – Status of total and phosphorylated kinase, phosphatase and phosphoprotein levels in DM1 in mice skeletal muscle tissue biopsy. Values are represented as the number of times in which a protein presented increased, similar or decreased values in DM1 in comparison with the control levels reported in the articles. A) Total protein levels in mice skeletal muscle tissue biopsy; B) Phosphorylated levels in mice skeletal muscle tissue biopsy.

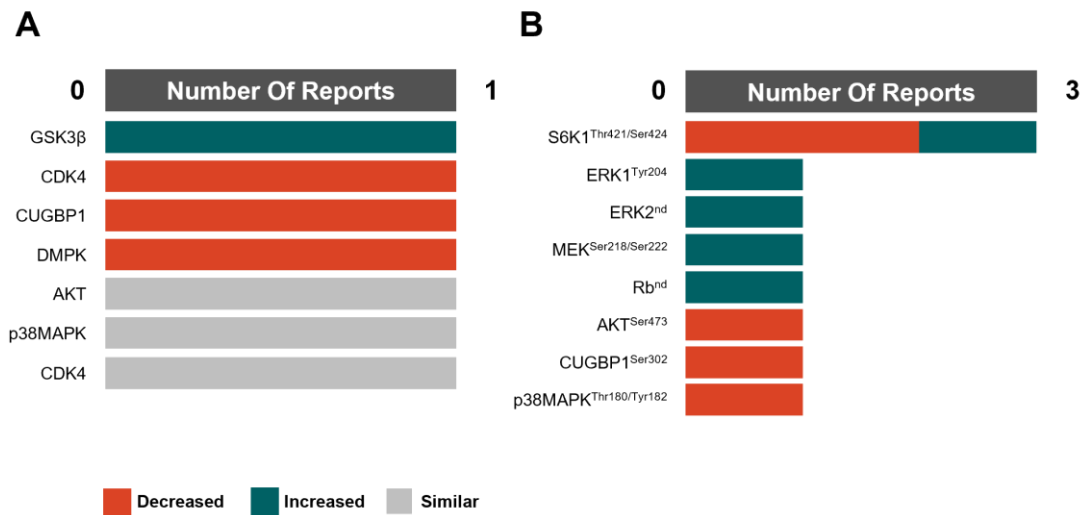

**Figure S5** – Status of total and phosphorylated kinase, phosphatase and phosphoprotein levels in DM1 upon skeletal muscle differentiation. Values are represented as the number of times in which a protein presented increased, similar or decreased values in DM1 in comparison with the control levels reported in the articles. A) Total protein levels upon skeletal muscle differentiation; B) Phosphorylated levels upon skeletal muscle differentiation; nd- not defined
