# Supplementary material for: Protein Phosphorylation Alterations in Myotonic Dystrophy Type 1: A Systematic Review
Source: MDPI journal article supplement (doi:10.3390/ijms24043091), 2023-02-04
Supplement: s1 [file s1]

## Supplementary Table

### Protein Phosphorylation Alterations in Myotonic Dystrophy Type 1: A Systematic Review

Adriana Costa, Ana C. Cruz, Filipa Martins \* and Sandra Rebelo \*

Institute of Biomedicine (iBiMED), Department of Medical Sciences, University of Aveiro,  
3810-193 Aveiro, Portugal

\* Correspondence: samartins@ua.pt (F.M.); srebelo@ua.pt (S.R.)

**Table S1.** Summary data of the included studies of the systematic review.

| <i>Author, Year, Country</i>                      | <i>Sample type and characterization</i>                                                                                                                                      | <i>Evaluation method</i> | <i>Phosphorylation associated proteins</i> | <i>Main findings</i>                                                                                                                                                                                                                                                                                          |
|---------------------------------------------------|------------------------------------------------------------------------------------------------------------------------------------------------------------------------------|--------------------------|--------------------------------------------|---------------------------------------------------------------------------------------------------------------------------------------------------------------------------------------------------------------------------------------------------------------------------------------------------------------|
| <b>André et al. 2019, The Netherlands</b><br>[23] | <u>DM1</u> : Human congenital DM1 proliferating myoblasts; CTG repeat length: 2600<br><u>CTL</u> : Human congenital DM1 proliferating myoblasts with excision of CTG repeats | Mass spectrometry        | CDK6                                       | <u>Total CDK6 level</u> : Significantly <b>increased</b> in DM1 (fold change: 0.66; p<0.05) vs CTL.                                                                                                                                                                                                           |
|                                                   |                                                                                                                                                                              |                          | INPP4B                                     | <u>Total INPP4B level</u> : Significantly <b>increased</b> in DM1 (fold change: 0.66; p<0.05) vs CTL.                                                                                                                                                                                                         |
|                                                   |                                                                                                                                                                              |                          | PRKAR1B                                    | <u>Total PRKAR1B level</u> : Significantly <b>decreased</b> in DM1 (fold change: -0.59; p<0.05) vs CTL.                                                                                                                                                                                                       |
|                                                   |                                                                                                                                                                              |                          | PTPRF                                      | <u>Total PTPRF level</u> : Significantly <b>increased</b> in DM1 (fold change: 0.64; p<0.05) vs CTL.                                                                                                                                                                                                          |
| <b>Beffy et al. 2010, Italy</b><br>[24]           | <u>DM1</u> : Human fetus-derived myoblasts; CTG repeat length: 3200<br><u>CTL</u> : Human fetus-derived myoblasts; CTG repeat length: 20                                     | Western blot             | DMPK                                       | <u>Total DMPK level</u> : <b>Decreased</b> in DM1 during all the differentiation process (d0-d6).<br><u>Semi-quantitative total DMPK level (fold change)</u> :<br>d0: DM1: 0.3; CTL: 0.5; d2: DM1: 0.3; CTL: 0.7; d4: DM1: 0.3; CTL: 0.6; d6: DM1: 0.3; CTL: 0.5 (p: NR)                                      |
|                                                   |                                                                                                                                                                              |                          | ERK1                                       | <u>p-ERK1 level</u> : Significantly <b>increased</b> levels of p-ERK1 (Tyr204) in DM1 vs CTL from d0 to d4 of differentiation. At d6, the levels p-ERK1 (Tyr204) <b>decrease</b> to the same background level as CTL. (p: NR)                                                                                 |
|                                                   |                                                                                                                                                                              |                          | ERK2                                       | <u>p-ERK2 level</u> : <b>Increased</b> p-ERK2 in DM1 vs CTL, in d0 and d2 of differentiation.<br><br><u>p-ERK2/Total ERK2 ratio</u> :<br>d0: DM1 > CTL (p<0.01); d2: DM1 > CTL (p<0.01); d4: DM1 > CTL (p=ns); d6: DM1 > CTL (p=ns)<br><u>DM1: d0&gt; d2 &gt; d4 &gt; d6; CTL: d0 &lt; d2 &lt; d4 &gt; d6</u> |
|                                                   |                                                                                                                                                                              |                          | MEK                                        | <u>p-MEK level</u> : <b>Increased</b> p-MEK (Ser 218/Ser222) in DM1 vs CTL, in d0 and d2 of differentiation.                                                                                                                                                                                                  |

|                                                   |                                                                                                                                                                                                                                                      |                                     |             |                                                                                                                                                                                                                                                                                                                                                                                                                                                                                                  |
|---------------------------------------------------|------------------------------------------------------------------------------------------------------------------------------------------------------------------------------------------------------------------------------------------------------|-------------------------------------|-------------|--------------------------------------------------------------------------------------------------------------------------------------------------------------------------------------------------------------------------------------------------------------------------------------------------------------------------------------------------------------------------------------------------------------------------------------------------------------------------------------------------|
|                                                   |                                                                                                                                                                                                                                                      |                                     |             | <p><u>p-MEK/Total MEK ratio:</u><br/> <u>d0:</u> DM1 &gt; CTL (p&lt;0.01); <u>d2:</u> DM1 &gt; CTL (p&lt;0.05); <u>d4:</u> DM1 &gt; CTL (p=ns); <u>d6:</u> DM1 &gt; CTL (p=ns)<br/> <u>DM1:</u> d0&gt;d2&gt;d4&gt;d6; <u>CTL:</u> d0&lt;d2&gt;d4~d6</p>                                                                                                                                                                                                                                          |
|                                                   |                                                                                                                                                                                                                                                      |                                     | p38MAPK     | <p>Total p38MAPK level: <b>Similar</b> between DM1 vs CTL during differentiation.<br/> <u>p-p38MAPK level:</u> <b>Decreased</b> (50%) p-p38MAPK (Thr180/Tyr182) in DM1 during differentiation.</p> <p><u>p-p38MAPK/Total p38MAPK ratio:</u><br/> <u>d0:</u> DM1 &lt; CTL (p&lt;0.05); <u>d2:</u> DM1 &lt; CTL (p&lt;0.05); <u>d4:</u> DM1 &lt; CTL (p&lt;0.05);<br/> <u>d6:</u> DM1 &lt; CTL (p&lt;0.05)<br/> <u>DM1:</u> d0 &gt; d2 &gt; d4 &gt; d6; <u>CTL:</u> d0 &lt; d2 &gt; d4 &lt; d6</p> |
|                                                   |                                                                                                                                                                                                                                                      |                                     | Rb          | <p><u>p-Rb level:</u> <b>Increased</b> in p-Rb during day 0 and day 2 of differentiation in DM1 vs CTL. <b>In both</b> DM1 and CTL differentiation, Rb protein is completely <b>dephosphorylated</b> at day 4 and 6 upon incubation with differentiating medium.</p> <p><u>p-Rb/dp-Rb ratio (fold change):</u><br/> <u>d0:</u> DM1: 0.78 vs CTL: 0.34 (p:NR); <u>d2:</u> DM1: 0.56 vs CTL: 0.27 (p:NR);<br/> <u>d4:</u> DM1: n.d vs CTL: 0.15 (p:NR); <u>d6:</u> DM1: n.d vs CTL: n.d (p:NR)</p> |
|                                                   |                                                                                                                                                                                                                                                      |                                     | S6K1        | <p><u>p-S6K1 level:</u> Significantly <b>reduced</b> levels of p-S6K1 (Thr421/Ser424) during day 0,2, and 4 of differentiation in DM1 vs CTL.</p> <p><u>p-S6K1/Total S6K1 ratio:</u><br/> <u>d0:</u> DM1 &lt; CTL (p&lt;0.05); <u>d2:</u> DM1 &lt; CTL (p&lt;0.01); <u>d4:</u> DM1 &lt; CTL (p&lt;0.01); <u>d6:</u> DM1 &lt; CTL (p=ns)<br/> <u>DM1:</u> d0 &lt; d2 ~ d4 &gt; d6; <u>CTL:</u> d0 &lt; d2 &gt; d4 &gt; d6</p>                                                                     |
| <b>Botta et al. 2013, Italy</b><br>[25]           | <p><u>DM1:</u> Human <i>vastus lateralis</i> differentiated myotubes; n=2; CTG Repeat length (range): 800-1500 (n=8)</p> <p><u>CTL:</u> Human <i>vastus lateralis</i> differentiated myotubes from subjects without neuromuscular disorders; n=3</p> | Western Blot;<br>Immunofluorescence | Lyn kinases | <p><u>Total Lyn level:</u> Significantly <b>increased</b> Lyn protein levels and nuclear localization (570%) in DM1 vs CTL.</p> <p><u>Lyn activity:</u> Significantly <b>increased</b> nuclear activity and Tyr phosphorylation activity (250%) in DM1 vs CTL.</p> <p><u>Semi-quantitative total Lyn level:</u> DM1 &gt; CTL (p&lt;0.02)<br/> <u>Semi-quantitative p-Tyr phosphorylation:</u> DM1 &gt; CTL (p&lt;0.02)</p>                                                                       |
| <b>Brockhoff et al. 2017, Switzerland</b><br>[26] | <p><u>DM1:</u> HSA<sup>LR</sup> mice skeletal muscle tissue biopsies; Age: 2-month-old; CTG repeat Length: 250<br/> <u>CTL:</u> Background strain (FVB/N) mice skeletal muscle tissue biopsies</p>                                                   | Western blot                        | AKT         | <p><u>p-AKT level:</u> <b>Similar</b> p-AKT (Ser473) levels between fed and 24h starvation mice in DM1 vs CTL.</p> <p><u>p-AKT/Total AKT ratio:</u><br/> Fed: DM1 ~ CTL (p=ns); 24hStarvation: DM1 &gt; CTL (p=ns)</p>                                                                                                                                                                                                                                                                           |

|  |                                                                                                                                                                                                                                   |          |  |                                                                                                                                                                                                                                                                                                                                                                                                                                                                                                     |
|--|-----------------------------------------------------------------------------------------------------------------------------------------------------------------------------------------------------------------------------------|----------|--|-----------------------------------------------------------------------------------------------------------------------------------------------------------------------------------------------------------------------------------------------------------------------------------------------------------------------------------------------------------------------------------------------------------------------------------------------------------------------------------------------------|
|  | Fed Conditions - n= 3<br>24h Starvation Conditions- n= 4                                                                                                                                                                          |          |  | Fed DM1 > 24hStarvation DM1 (p<0.05); Fed CTL > 24hStarvation CTL (p<0.05)                                                                                                                                                                                                                                                                                                                                                                                                                          |
|  |                                                                                                                                                                                                                                   | CaMKIIβM |  | <u>Total CaMKIIβM level:</u> <b>Decreased</b> levels of CaMKIIβM in DM1 vs CTL. (p: NR)<br><br><u>p-CaMKIIβM level:</u> <b>Decreased</b> levels of p-CaMKIIβM (Thr286) in DM1 vs CTL in fed and 24h starvation mice.<br><br><u>p-CaMKIIβM fold change:</u><br>Fed: DM1 < CTL (p<0.05); 24hStarvation: DM1 < CTL (p<0.05)<br>Fed DM1 ~ 24hStarvation DM1 (p=ns); Fed CTL ~ 24hStarvation CTL (p=ns)                                                                                                  |
|  | <u>DM1:</u> HSA <sup>LR</sup> mice skeletal muscle tissue biopsies; n=3; Age: 2-month-old; CTG repeat length: 250<br><u>CTL:</u> FVB/N mice skeletal muscle tissue biopsies; n=4                                                  | AMPK     |  | <u>p-AMPK level:</u> <b>Similar</b> p-AMPK (Thr172) levels between fed and 45h starvation DM1 vs CTL. <b>Reduced</b> levels of p-AMPK (Thr172) in 24h starvation DM1 mice vs CTL.<br><br><u>p-AMPK/Total AMPK ratio:</u><br>Fed: DM1 > CTL (p=ns); 24h Starvation: DM1 < CTL (p<0.05);<br>45hStarvation: DM1 < CTL (p=ns)                                                                                                                                                                           |
|  | <u>DM1:</u> HSA <sup>LR</sup> mice skeletal muscle tissue biopsies; Age: 2-month-old; CTG repeat length: 250<br><u>CTL:</u> FVB/N mice skeletal muscle tissue biopsies<br>Fed Conditions -n= 3<br>24hStarvation Conditions - n= 7 | RpS6     |  | <u>p-RpS6 level:</u> <b>Increased</b> levels of p-RpS6 (Ser235/Ser236; Ser240/Ser244) in DM1 vs CTL in 24h starvation mice. <b>Similar</b> levels in fed and 45 h starvation in DM1 vs CTL.<br><br><u>p-RpS6/Total RpS6 ratio:</u><br>Fed: DM1 > CTL (p=ns); 24h Starvation: DM1 > CTL (p<0.001);<br>45h Starvation: DM1 < CTL (p=ns)<br><br>Fed DM1 > 24hStarvation DM1 (p=ns); Fed CTL > 24hStarvation CTL (p<0.01)<br>Fed DM1 > 45hStarvation DM1 (p<0.01); Fed CTL > 45hStarvation CTL (p<0.05) |
|  |                                                                                                                                                                                                                                   | LKB1     |  | <u>Total LKB1 level:</u> <b>Similar</b> in DM1 vs CTL in fed and 24h starvation mice. (p: NR)                                                                                                                                                                                                                                                                                                                                                                                                       |
|  |                                                                                                                                                                                                                                   | TAK1     |  | <u>Total TAK1 level:</u> <b>Similar</b> in DM1 vs CTL in fed and 24h starvation mice. (p: NR)                                                                                                                                                                                                                                                                                                                                                                                                       |
|  |                                                                                                                                                                                                                                   | mTOR     |  | <u>p-mTOR level:</u> <b>Similar</b> levels of p-mTOR (Ser2448) between fed and 24h starvation mice in DM1 vs CTL.<br><br><u>p-mTOR/mTOR ratio:</u><br>Fed: DM1 > CTL (p=ns); 24h Starvation: DM1 < CTL (p=ns)                                                                                                                                                                                                                                                                                       |
|  |                                                                                                                                                                                                                                   | S6K1     |  | <u>p-S6K1 level:</u> <b>Similar</b> levels of p-S6K1 (Thr389) in fed DM1 vs fed CTL mice. <b>Increased</b> levels of p-S6K1 (Thr389) in 24h starvation DM1 vs CTL. (p: NR)                                                                                                                                                                                                                                                                                                                          |
|  |                                                                                                                                                                                                                                   | TSC2     |  | <u>p-TSC2 level:</u> <b>Similar</b> levels of p-TSC2 (Ser1387) in DM1 vs CTL fed and 24h starvation mice. (p: NR)                                                                                                                                                                                                                                                                                                                                                                                   |

|                                       |                                                                                                                                      |              |         |                                                                                                                                                                                                                                                                                                                                                                                                                                                                                                                                                                                                                                   |
|---------------------------------------|--------------------------------------------------------------------------------------------------------------------------------------|--------------|---------|-----------------------------------------------------------------------------------------------------------------------------------------------------------------------------------------------------------------------------------------------------------------------------------------------------------------------------------------------------------------------------------------------------------------------------------------------------------------------------------------------------------------------------------------------------------------------------------------------------------------------------------|
|                                       |                                                                                                                                      |              | ULK1    | <p>p-ULK1 level: <b>Slight but not significant increase</b> of p-ULK1 (Ser757) in DM1 vs CTL in 24h starvation mice (p: NR). <b>Similar</b> levels of p-ULK1 (Ser317) in DM1 vs CTL in fed and 24h starved mice. (p: NR)</p> <p>p-ULK1/Total ULK1 ratio (Ser757):<br/>Fed; DM1 &lt; CTL (p=ns); 24h Starvation: DM1 &gt; CTL (p=ns);</p> <p>Fed DM1 &gt; 24hStarvation DM1 (p=ns); Fed CTL &gt; 24hStarvation CTL (p&lt;0.01)</p> <p>p-ULK1/Total ULK1 ratio (Ser317):<br/>Fed: DM1 &lt; CTL (p=ns); 24h Starvation: DM1 &lt; CTL (p=ns);</p> <p>Fed DM1 &lt; 24hStarvation DM1 (p=ns); Fed CTL &lt; 24hStarvation CTL (p=ns)</p> |
|                                       | <p><u>DM1</u>: Human patients skeletal muscle tissue biopsies; n=3</p> <p><u>CTL</u>: Human skeletal muscle tissue biopsies; n=5</p> |              | AMPK    | <p><u>Total AMPK level</u>: <b>Similar</b> levels in DM1 vs CTL (p: NR)</p> <p>p-AMPK level: <b>Similar</b> levels of p-AMPK (Thr172) in DM1 vs CTL. (p: NR)</p>                                                                                                                                                                                                                                                                                                                                                                                                                                                                  |
|                                       |                                                                                                                                      |              | AKT     | <p><u>Total AKT level</u>: <b>Similar</b> levels in DM1 vs CTL. (p: NR)</p> <p>p-AKT level: <b>Similar</b> levels of p-AKT (Ser473) in DM1 vs CTL. (p:NR)</p>                                                                                                                                                                                                                                                                                                                                                                                                                                                                     |
|                                       |                                                                                                                                      |              | S6K1    | <p>p-S6K1 level: <b>Increased</b> levels of p-S6K1 (Thr389) in DM1 vs CTL. (p: NR)</p>                                                                                                                                                                                                                                                                                                                                                                                                                                                                                                                                            |
|                                       |                                                                                                                                      |              | RpS6    | <p>p-RpS6 level: <b>Increased</b> levels of p-RpS6 (Ser235/Ser236; Ser240/Ser244) in DM1 vs CTL. (p: NR)</p>                                                                                                                                                                                                                                                                                                                                                                                                                                                                                                                      |
|                                       | <p><u>DM1</u>: Human patients fibroblast-derived myotubes; n=3</p> <p><u>CTL</u>: Human fibroblast-derived myotubes</p>              |              | AKT     | <p>p-AKT level: <b>Similar</b> levels of p-AKT (Ser473) in DM1 vs CTL upon starvation. (p: NR)</p>                                                                                                                                                                                                                                                                                                                                                                                                                                                                                                                                |
|                                       |                                                                                                                                      |              | AMPK    | <p>p-AMPK level: <b>Similar</b> levels of p-AMPK (Thr172) in DM1 vs CTL upon starvation. (p: NR)</p>                                                                                                                                                                                                                                                                                                                                                                                                                                                                                                                              |
|                                       |                                                                                                                                      |              | RpS6    | <p>p-RpS6 level: <b>Increased</b> levels of p-RpS6 (Ser235/Ser236; Ser240/Ser244) in DM1 vs CTL upon starvation (p: NR).</p>                                                                                                                                                                                                                                                                                                                                                                                                                                                                                                      |
| <b>Denis et al. 2013, France [27]</b> | <p><u>DM1</u>: Human neural stem cells with large CTG expansions; n=2</p> <p><u>CTL</u>: Human neural stem cells; n=1</p>            | Western blot | AKT     | <p><u>Total AKT levels</u>: <b>Similar</b> levels between DM1 vs CTL.</p> <p>p-AKT levels: <b>Similar</b> levels of p-AKT (Ser473) between DM1 vs CTL</p> <p>p-AKT/Total AKT ratio: DM1 &lt; CTL (p=ns)</p>                                                                                                                                                                                                                                                                                                                                                                                                                       |
|                                       |                                                                                                                                      |              | AMPK    | <p><u>Total AMPK levels</u>: <b>Similar</b> levels between DM1 vs CTL.</p> <p>p-AMPK levels: <b>Similar</b> levels of p-AMPK (Thr172) between DM1 vs CTL.</p> <p>p-AMPK/ Total AMPK ratio: DM1 &lt; CTL (p=ns)</p>                                                                                                                                                                                                                                                                                                                                                                                                                |
|                                       |                                                                                                                                      |              | GSK3α/β | <p><u>Total GSK3α/β level</u>: <b>Similar</b> levels between DM1 vs CTL.</p>                                                                                                                                                                                                                                                                                                                                                                                                                                                                                                                                                      |

|                                                |                                                                                                                                                                            |                                      |      |                                                                                                                                                                                                                                                                                                                                                                                        |
|------------------------------------------------|----------------------------------------------------------------------------------------------------------------------------------------------------------------------------|--------------------------------------|------|----------------------------------------------------------------------------------------------------------------------------------------------------------------------------------------------------------------------------------------------------------------------------------------------------------------------------------------------------------------------------------------|
|                                                |                                                                                                                                                                            |                                      |      | <p><u>p-GSK3<math>\alpha</math>/<math>\beta</math> level:</u> <b>Decreased</b> levels of p-GSK3<math>\alpha</math>/<math>\beta</math> (Ser21/Ser9) between DM1 vs CTL.</p> <p><u>p-GSK3<math>\alpha</math>/ Total GSK3<math>\alpha</math> ratio:</u> DM1 &lt; CTL (p&lt;0.05)</p> <p><u>p- GSK3<math>\beta</math>/Total GSK3<math>\beta</math> ratio:</u> DM1 &lt; CTL (p&lt;0.05)</p> |
|                                                |                                                                                                                                                                            |                                      | Rb   | <p><u>p-Rb level:</u> <b>Decreased</b> levels of p-Rb (Ser801/Ser811) in DM1 vs CON.</p> <p><u>p-Rb/Total Rb ratio:</u> DM1 &lt; CTL (p&lt;0.05)</p>                                                                                                                                                                                                                                   |
|                                                |                                                                                                                                                                            |                                      | RpS6 | <p><u>Total RpS6 level:</u> <b>Similar</b> levels between DM1 vs CTL.</p> <p><u>p-RpS6 level:</u> <b>Decreased</b> levels of p-RpS6 (Ser235/Ser236 and Ser240/Ser245) between DM1 vs CTL.</p> <p><u>p-RpS6 (Ser235/Ser236)/Total RpS6 ratio:</u> DM1 &lt; CTL (p&lt;0.001)</p> <p><u>p-RpS6 (Ser240/Ser245)/Total RpS6 ratio:</u> DM1 &lt; CTL (p&lt;0.05)</p>                         |
| <b>Furling et al. 2003, France and UK [28]</b> | DM1: Human fetal congenital DM1 skeletal muscle tissue biopsies; n=5; CTG repeat length (range): 1800-3700<br><u>CTL:</u> Human fetal skeletal muscle tissue biopsies; n=9 | Western blot                         | DMPK | <p><u>Total DMPK levels:</u> <b>Decreased</b> levels in DM1 vs CTL.</p> <p><u>Semi-quantitative DMPK levels (fold change):</u> DM1: 0.89 vs CTL: 1.57 (Reduction to 57% of control; p=0.006)</p>                                                                                                                                                                                       |
|                                                | DM1: Human fetal congenital DM1 myotubes;<br><u>CTL:</u> Human fetal myotubes without neuromuscular diseases                                                               |                                      | DMPK | <p><u>Total DMPK levels:</u> <b>Decreased</b> levels in DM1 vs CTL (Reduction of 53% of control values; p: NR)</p>                                                                                                                                                                                                                                                                     |
| <b>Gao et al. 2013, USA [29]</b>               | DM1: Human DM1 skeletal muscle tissue biopsies; n=9<br><u>CTL:</u> Human skeletal muscle tissue biopsies; n=7                                                              | Western blot<br>Immunohistochemistry | PKM2 | <p><u>Total PKM2 levels:</u> <b>Increased</b> levels in DM1 vs CTL. <b>Increased</b> presence in type 1 myofibers. (p: NR)</p>                                                                                                                                                                                                                                                         |
|                                                | DM1: Mouse C2C12 myoblasts with CUGexp RNA<br><u>CTL:</u> Mouse C2C12 myoblasts                                                                                            |                                      |      | <p><u>Total PKM2 levels:</u> <b>Increased</b> levels in DM1 vs CTL. (p: NR)</p>                                                                                                                                                                                                                                                                                                        |
| <b>García-Puga et al. 2020, Spain [30]</b>     | DM1: Patient skin-derived fibroblasts; n=3; Age (Range): 34-71; CTG repeat length (Range): 167-1650 (n=7)                                                                  | Western blot                         | AKT  | <p><u>p-AKT levels:</u> <b>Decreased</b> levels of p-AKT (Ser473) in DM1 vs CTL.</p> <p><u>Semi-quantitative p-AKT levels:</u> DM1 &lt; CTL (p: NR)</p>                                                                                                                                                                                                                                |

|                                 |                                                                                                                                                                                                                                    |                      |                                                                                           |                                                                                                                                                                                                                                                                                                                                                             |
|---------------------------------|------------------------------------------------------------------------------------------------------------------------------------------------------------------------------------------------------------------------------------|----------------------|-------------------------------------------------------------------------------------------|-------------------------------------------------------------------------------------------------------------------------------------------------------------------------------------------------------------------------------------------------------------------------------------------------------------------------------------------------------------|
|                                 | <u>CTL</u> : Control skin-derived fibroblasts; n=3;<br>Age (Range): 48-53                                                                                                                                                          |                      | DMPK                                                                                      | <u>Total DMPK levels</u> : <b>Decreased</b> levels in DM1 vs CTL.                                                                                                                                                                                                                                                                                           |
|                                 |                                                                                                                                                                                                                                    |                      | p38MAPK                                                                                   | <u>Semi-quantitative total DMPK levels</u> : DM1 < CTL (p<0.01)<br><u>p-p38MAPK levels</u> : <b>Increased</b> levels of p-p38MAPK (Thr180/Tyr182) in 2-fold in DM1 vs CTL.<br><br><u>p-p38MAPK/Total p38MAPK ratio</u> : DM1 > CTL (p<0.05)                                                                                                                 |
| Huichalaf et al. 2010, USA [31] | <u>DM1</u> : Human primary <i>biceps brachii</i> myoblasts; n=1; CTG repeat length: 320<br><u>CTL</u> : Human primary <i>biceps brachii</i> myoblast cells                                                                         | Western blot         | CUGBP1                                                                                    | <u>Total CUGBP1 levels</u> : <b>Increased</b> levels in DM1 vs CTL. (p: NR)<br><br><u>p-CUGBP1 levels</u> : <b>Reduced</b> levels of p-CUGBP1 (Ser302) in DM1 vs CTL. (p: NR)                                                                                                                                                                               |
|                                 |                                                                                                                                                                                                                                    |                      | eIF2α                                                                                     | <u>p-eIF2α levels</u> : <b>Increased</b> levels of p-eIF2α (Ser51) in DM1 vs CTL. (p: NR)                                                                                                                                                                                                                                                                   |
|                                 |                                                                                                                                                                                                                                    |                      | PKR                                                                                       | <u>Total PKR levels</u> : <b>Increased</b> levels in DM1 vs CTL. (p: NR)                                                                                                                                                                                                                                                                                    |
|                                 | CUGBP1                                                                                                                                                                                                                             |                      | <u>Total CUGBP1 levels</u> : <b>Increased</b> levels in DM1 vs CTL. (p: NR)               |                                                                                                                                                                                                                                                                                                                                                             |
|                                 | eIF2α                                                                                                                                                                                                                              |                      | <u>p-eIF2α levels</u> : <b>Increased</b> levels of p-eIF2α (Ser51) in DM1 vs CTL. (p: NR) |                                                                                                                                                                                                                                                                                                                                                             |
| Ikezoe et al. 2007, Japan [32]  | <u>DM1</u> : CHO-tTA cells with 960 CUGexp RNA<br><u>CTL</u> : CHO cells without CUGexp RNA                                                                                                                                        | Immunohistochemistry | eIF2α                                                                                     | <u>p-eIF2α levels</u> : <b>Increased</b> levels of p-eIF2α (Ser51) in DM1 vs CTL. (p: NR)                                                                                                                                                                                                                                                                   |
|                                 |                                                                                                                                                                                                                                    |                      | PERK                                                                                      | <u>p-PERK levels</u> : <b>Increased</b> levels of p-PERK in 4 of 5 patients. (p: NR)                                                                                                                                                                                                                                                                        |
| Jones et al. 2012, USA [33]     | <u>DM1</u> : Human patients <i>biceps brachii</i> skeletal muscle tissue biopsies; n=8; Age (range): 42-46<br><br><u>CTL</u> : Healthy participants <i>biceps brachii</i> skeletal muscle tissue biopsies; n=5; Age (range): 46-54 | Western blot         | CUGBP1                                                                                    | <u>Total CUGBP1 levels</u> : <b>Increased</b> in DM1 vs CTL.<br><br><u>Semi-quantitative total CUGBP1 levels</u> : DM1 > CTL (p: NR)                                                                                                                                                                                                                        |
|                                 |                                                                                                                                                                                                                                    |                      | Cyclin D3                                                                                 | <u>Total Cyclin D3 levels</u> : <b>Decreased</b> in DM1 vs CTL.<br><br><u>p-Cyclin D3 levels</u> : <b>Increased</b> levels of p-Cyclin D3 (Thr283) in DM1 vs CTL.<br><br><u>Semi-quantitative total Cyclin D3 levels</u> : DM1 < CTL (p: NR)<br><u>p-Cyclin D3/Total Cyclin D3 ratio</u> : DM1 > CTL (p: NR)                                                |
|                                 |                                                                                                                                                                                                                                    |                      | GSK3β                                                                                     | <u>Total GSK3β levels</u> : <b>Increased</b> in DM1 vs CTL.<br><br><u>p-GSK3β levels</u> : <b>Increased</b> levels of p-GSK3β (Tyr216) in DM1 vs CTL. <b>Decreased</b> levels of p-GSK3β (Ser9) in DM1 vs CTL.<br><br><u>Semi-quantitative total GSK3β levels</u> : DM1 > CTL (p: NR)<br><u>Semi-quantitative p-GSK3β (Ser9) levels</u> : DM1 < CTL (p: NR) |

|                               |                                                                                                                                                                            |              |           |                                                                                                                                                                                                                                                                                                                                                                                                                                 |
|-------------------------------|----------------------------------------------------------------------------------------------------------------------------------------------------------------------------|--------------|-----------|---------------------------------------------------------------------------------------------------------------------------------------------------------------------------------------------------------------------------------------------------------------------------------------------------------------------------------------------------------------------------------------------------------------------------------|
|                               | DM1: Human DM1 myoblasts; n=8; Age (range): 42-46<br><br>CTL: Human myoblasts; n=5; Age (range): 46-54                                                                     |              | GSK3β     | Total GSK3β levels: <b>Increased</b> levels of cytoplasmic and nuclear GSK3β in DM1 vs CTL during all steps of myoblast differentiation (p: NR).                                                                                                                                                                                                                                                                                |
|                               | DM1: HSA <sup>LR</sup> mice skeletal muscle tissue biopsies; n=6; Age: 6-months-old<br>CTL: WT mice skeletal muscle tissue biopsies; Age: 6-months-old                     |              | CUGBP1    | Total CUGBP1 levels: <b>Increased</b> levels in DM1 vs CTL.<br><br>Semi-quantitative total CUGBP1 levels: DM1 > CTL (p:NR)                                                                                                                                                                                                                                                                                                      |
|                               |                                                                                                                                                                            |              | Cyclin D3 | Total Cyclin D3 levels: <b>Decreased</b> levels in DM1.<br><br>Semi-quantitative total Cyclin D3 levels: DM1 < CTL (p: NR)                                                                                                                                                                                                                                                                                                      |
|                               |                                                                                                                                                                            |              | GSK3β     | Total GSK3β levels: <b>Increased</b> levels in DM1 vs CTL.<br><br>Semi-quantitative total GSK3β levels: DM1 > CTL (p: NR)                                                                                                                                                                                                                                                                                                       |
|                               | DM1: HSA <sup>LR</sup> mice skeletal muscle tissue biopsies; n=6; Age: 1-month-old<br>CTL: WT mice skeletal muscle tissue biopsies; Age: 1-month-old                       |              | GSK3β     | Total GSK3β levels: <b>Increased</b> levels in DM1 vs CTL.<br>Semi-quantitative total GSK3β: DM1 < CTL (p: NR)                                                                                                                                                                                                                                                                                                                  |
| Ketley et al. 2020, UK [34]   | DM1: Human patients <i>vastus lateralis</i> skeletal muscle tissue biopsies; n=4<br>CTL: Healthy participants <i>vastus lateralis</i> skeletal muscle tissue biopsies; n=4 | Western blot | CDK12     | Total CDK12 levels: <b>Increased</b> levels in DM1 vs CTL in 48%.<br>Semi-quantitative total CDK12 levels: DM1 > CTL (p=0.02)                                                                                                                                                                                                                                                                                                   |
| Khajavi et al. 2001, USA [35] | DM1: Human patients LBCLs; n=18                                                                                                                                            | Western blot | AKT       | Total AKT levels: <b>Not significantly different</b> levels across different CTG repeat lengths. (p: NR)<br><br>p-AKT levels: <b>Not significantly different</b> levels of p-AKT (Ser473) in DM1 that correlated with CTG Repeat length. (p: NR)                                                                                                                                                                                |
|                               |                                                                                                                                                                            |              | ERK 1/2   | Total ERK1/2 levels: <b>Not significantly different</b> across different CTG repeat lengths. (p: NR)<br><br>p-ERK 1/2 levels: <b>Increased levels</b> of p-ERK 1/2 (Thr202/Tyr204) in DM1 that correlated with CTG Repeat length. (p: NR)<br><br>Semi-quantitative p-ERK1/2 levels (fold change):<br>DM1 550 repeats: 0.27 vs DM1 740 repeats: 0.42 vs DM1 750 repeats: 0.50 vs DM1 770 repeats: 0.63 vs DM1 1150 repeats: 0.95 |

|                                        |                                                                                                                                                |                            |                                                                                                                                                                                                                                                                                                                                                                                                                                                                                                                                                                      |                                                                                                                                                                                |
|----------------------------------------|------------------------------------------------------------------------------------------------------------------------------------------------|----------------------------|----------------------------------------------------------------------------------------------------------------------------------------------------------------------------------------------------------------------------------------------------------------------------------------------------------------------------------------------------------------------------------------------------------------------------------------------------------------------------------------------------------------------------------------------------------------------|--------------------------------------------------------------------------------------------------------------------------------------------------------------------------------|
| Kim et al. 2016, USA [36]              | DM1: DM5 mice skeletal muscle tissue biopsies with CUGexp RNA and doxycycline induction; n (range)= 3-5                                        | Western blot               | CUGBP1                                                                                                                                                                                                                                                                                                                                                                                                                                                                                                                                                               | <u>Total protein levels:</u> <b>Increased</b> levels in DM1 vs CTL.<br><br><u>Semi-quantitative total CUGBP1 levels:</u> DM1 > CTL (p=0.05)                                    |
|                                        | GSK3β                                                                                                                                          |                            | <u>Total GSK3β:</u> <b>Increased</b> in DM1 vs CTL<br><br><u>Semi-quantitative total GSK3β relative levels (fold change):</u> DM1: 2.4 vs CTL: 1 (p: NR)                                                                                                                                                                                                                                                                                                                                                                                                             |                                                                                                                                                                                |
|                                        | PKC                                                                                                                                            |                            | <u>Total PKCα levels:</u> <b>Similar</b> in DM1 vs CTL.<br><br><u>Total PKCθ levels:</u> <b>Similar</b> in DM1 vs CTL.<br><br><u>p-PKCα/βII levels:</u> <b>Similar</b> in p-PKCα/βII (Thr638/Thr641) in DM1 vs CTL.<br><br><u>p-PKCθ levels:</u> <b>Increase</b> in p-PKCθ (Thr538) in DM1 vs CTL.<br><br><u>Semi-quantitative total PKCα levels:</u> DM1 < CTL (p=ns)<br><u>Semi-quantitative total PKCθ levels:</u> DM1 < CTL (p=ns)<br><u>Semi-quantitative p-PKCα/βII levels:</u> DM1 < CTL (p=ns)<br><u>Semi-quantitative p-PKCθ levels:</u> DM1 > CTL (p=0.05) |                                                                                                                                                                                |
| Kuyumcu-Martinez et al. 2007, USA [37] | DM1: Human patients heart tissue<br>CTL: Human heart tissue from unaffected individuals                                                        | Western blot               | CUGBP1                                                                                                                                                                                                                                                                                                                                                                                                                                                                                                                                                               | <u>p-CUGBP1 levels:</u> <b>Increased</b> phosphorylation in DM1 vs CTL. (p: NR)                                                                                                |
|                                        | DM1: Human patients fibroblast-derived myotubes; CTG repeat length: 2000<br>CTL: Human fibroblast-derived myotubes from unaffected individuals |                            | PKC                                                                                                                                                                                                                                                                                                                                                                                                                                                                                                                                                                  | <u>p-PKC levels:</u> 3 out of 4 DM1 patients with <b>activation</b> of p-PKCα and p-PKCβII in compared to CTL. (p: NR)                                                         |
|                                        | DM1: TAM mice cardiac tissue<br>CTL: Mice cardiac tissue                                                                                       |                            | CUGBP1                                                                                                                                                                                                                                                                                                                                                                                                                                                                                                                                                               | <u>p-CUGBP1 levels:</u> <b>Increased</b> rphosphorylation in DM1 vs CTL. (p: NR)                                                                                               |
|                                        | DM1: COS M6 cells with 960 CUGexp RNA<br>CTL: COS M6 cells without CUGexp RNA                                                                  | Western blot; Kinase Assay | CUGBP1                                                                                                                                                                                                                                                                                                                                                                                                                                                                                                                                                               | <u>Total CUGBP1 levels:</u> <b>Increased</b> steady-state levels in DM1 vs CTL. (p: NR)<br><br><u>p-CUGBP1 levels:</u> <b>Increased</b> phosphorylation in DM1 vs CTL. (p: NR) |
|                                        | PKC                                                                                                                                            |                            | <u>p-PKC levels:</u> <b>Increased</b> levels of p-PKCα and p-PKCβII in DM1 vs CTL. (p: NR)                                                                                                                                                                                                                                                                                                                                                                                                                                                                           |                                                                                                                                                                                |
| Llagostera et al. 2007, Spain [38]     | DM1: DMPK knockout mice cardiac tissue<br>CTL: WT mice cardiac tissue                                                                          | Western blot               | AKT                                                                                                                                                                                                                                                                                                                                                                                                                                                                                                                                                                  | <u>p-AKT levels:</u> <b>Decreased</b> levels in 39±5% of p-AKT (Ser473) in DM1 vs CTL upon activation of the insulin pathway (p<0.05).                                         |
|                                        |                                                                                                                                                | GSK3β                      | <u>p-GSK3β levels:</u> <b>Decreased</b> levels in 67±9% of p-GSK3β (Ser9) in DM1 vs CTL upon activation of the insulin pathway (p<0.05).                                                                                                                                                                                                                                                                                                                                                                                                                             |                                                                                                                                                                                |
|                                        |                                                                                                                                                | InsR/IGF-1R                | <u>p-Insulin/IGF-1 receptor levels:</u> <b>Decreased</b> levels in 54±10% of p-InsR (Tyr1150/Tyr1151) and p-IGF-1R (Tyr1135/Tyr1136) in DM1 vs CTL upon activation of the insulin pathway (p<0.05).                                                                                                                                                                                                                                                                                                                                                                  |                                                                                                                                                                                |



|                                                      |                                                                                                                                                                                                                                                                                                                                                                                                          |                                   |             |                                                                                                                                                                                                                                                                                                                                                                                                                                                                                                                                                                                                                                                                                                                                                                                                                                                                                                                                                                                                                                                                                                                                                                                                                                  |
|------------------------------------------------------|----------------------------------------------------------------------------------------------------------------------------------------------------------------------------------------------------------------------------------------------------------------------------------------------------------------------------------------------------------------------------------------------------------|-----------------------------------|-------------|----------------------------------------------------------------------------------------------------------------------------------------------------------------------------------------------------------------------------------------------------------------------------------------------------------------------------------------------------------------------------------------------------------------------------------------------------------------------------------------------------------------------------------------------------------------------------------------------------------------------------------------------------------------------------------------------------------------------------------------------------------------------------------------------------------------------------------------------------------------------------------------------------------------------------------------------------------------------------------------------------------------------------------------------------------------------------------------------------------------------------------------------------------------------------------------------------------------------------------|
|                                                      | <p><u>DM1</u>: DMPK knockout mice skeletal muscle tissue biopsies</p> <p><u>CTL</u>: WT mice skeletal muscle tissue biopsies</p>                                                                                                                                                                                                                                                                         |                                   | InsR/IGF-1R | <p><u>p-Insulin/IGF-1 receptor levels</u>: <b>Decreased</b> levels in 44±10% of p-InsR (Tyr1150/Tyr1151) and p-IGF-IR (Tyr1135/Tyr1136) in DM1 vs CTL upon activation of the insulin pathway (p&lt;0.05).</p>                                                                                                                                                                                                                                                                                                                                                                                                                                                                                                                                                                                                                                                                                                                                                                                                                                                                                                                                                                                                                    |
| <p><b>Llagostera et al. 2012, Spain</b><br/>[39]</p> | <p><u>DM1</u>: DMPK knockout mice cardiac tissue</p> <p><u>CTL</u>: WT mice cardiac tissue</p>                                                                                                                                                                                                                                                                                                           | Western blot                      | PLN         | <p><u>p-PLN levels</u>: <b>Increase</b> in 4-fold in the levels of p-PLN (Ser16) in CTL in response to isoproterenol (β-adrenergic agonist). In DMPK knockout mice, p-PLN (Ser16) levels were <b>unaltered</b>.</p> <p><u>p-PLN/Total PLN ratio</u>:</p> <p>Without isoproterenol activation: DM1 &lt; CTL (p&lt;0.05)</p> <p>With isoproterenol activation: DM1 &lt; CTL (p&lt;0.05)</p>                                                                                                                                                                                                                                                                                                                                                                                                                                                                                                                                                                                                                                                                                                                                                                                                                                        |
| <p><b>Morriss et al. 2018, USA</b><br/>[40]</p>      | <p><u>DM1</u>: TREDT960I mice skeletal muscle tissue biopsies + dox; n=12</p> <p>DM1 mice with moderate muscle wasting - n= 7</p> <p>DM1 mice with severe muscle wasting - n= 5</p> <p><u>CTL</u>: TREDT960I mice skeletal muscle tissue biopsies lacking the reverse transactivator + dox; n=8</p> <p>CTL mice with moderate muscle wasting - n= 4</p> <p>CTL mice with severe muscle wasting -n= 4</p> | <p>RPPA analysis/Western blot</p> | AMPKα       | <p><u>Total AMPKα levels</u>: <b>Similar</b> levels in DM1 vs CTL mice with moderate muscle wasting. <b>Increased</b> levels of AMPKα (F6) in severe muscle wasting mice in DM1 vs CTL.</p> <p><u>p-AMPKα levels</u>: <b>Increased</b> levels of p-AMPKα (Thr172) in DM1 vs CTL mice with severe muscle wasting. <b>Similar</b> levels of p-AMPKα (Thr172) in DM1 vs CTL mice with moderate muscle wasting.</p> <p><u>Semi-quantitative total AMPKα (23A3) levels</u>:</p> <p>Moderate muscle wasting: DM1 &lt; CTL (p=ns)</p> <p>Severe muscle wasting: DM1 &lt; CTL (p=ns)</p> <p><u>Semi-quantitative total AMPKα (F6) levels</u>:</p> <p>Moderate muscle wasting: DM1 &lt; CTL (p=ns)</p> <p>Severe muscle wasting: DM1 &gt; CTL (p=0.05)</p> <p><u>Semi-quantitative p-AMPKα levels</u>:</p> <p>Moderate muscle wasting: DM1 &lt; CTL (p=ns)</p> <p>Severe muscle wasting: DM1 &lt; CTL (p&lt;0.01)</p> <p><u>p-AMPKα (23A3)/Total AMPKα ratio</u>:</p> <p>Moderate muscle wasting: DM1 &gt; CTL (p=ns)</p> <p>Severe muscle wasting: DM1 &gt; CTL (p&lt;0.01)</p> <p><u>p-AMPKα (F6)/Total AMPKα ratio</u>:</p> <p>Moderate muscle wasting: DM1 &gt; CTL (p&lt;0.01)</p> <p>Severe muscle wasting: DM1 &gt; CTL (p=ns)</p> |
|                                                      |                                                                                                                                                                                                                                                                                                                                                                                                          | RPPA                              | c-Jun       | <p><u>p-c-Jun levels</u>: <b>Decreased</b> levels of p-c-Jun (Ser63) in DM1 vs CTL. (p: NR)</p>                                                                                                                                                                                                                                                                                                                                                                                                                                                                                                                                                                                                                                                                                                                                                                                                                                                                                                                                                                                                                                                                                                                                  |

|  |                                                                               |                            |               |                                                                                                                                                                                                                                                                                                                                                                                                                                                                                                                                                                                                                                                                                                                                                                                                                                                                                                                                                                   |
|--|-------------------------------------------------------------------------------|----------------------------|---------------|-------------------------------------------------------------------------------------------------------------------------------------------------------------------------------------------------------------------------------------------------------------------------------------------------------------------------------------------------------------------------------------------------------------------------------------------------------------------------------------------------------------------------------------------------------------------------------------------------------------------------------------------------------------------------------------------------------------------------------------------------------------------------------------------------------------------------------------------------------------------------------------------------------------------------------------------------------------------|
|  |                                                                               | RPPA                       | CDKN1B        | <u>p-CDKN1B levels:</u> <b>Increased</b> levels of p-CDKN1B (Thr198) in DM1 vs CTL. (p: NR)                                                                                                                                                                                                                                                                                                                                                                                                                                                                                                                                                                                                                                                                                                                                                                                                                                                                       |
|  |                                                                               | RPPA analysis/Western blot | PDGFR $\beta$ | <p><u>Total PDGFR<math>\beta</math> levels:</u> <b>Increased</b> levels in DM1 vs CTL mice with severe muscle wasting. <b>Similar</b> in DM1 vs CTL mice with moderate muscle wasting.</p> <p><u>p-PDGFR<math>\beta</math> levels:</u> <b>Increased</b> levels of p-PDGFR<math>\beta</math> (Tyr751) in DM1 vs CTL mice with severe muscle wasting. <b>Similar</b> in DM1 vs CTL mice with moderate muscle wasting.</p> <p><u>Semi-quantitative total PDGFR<math>\beta</math> levels:</u><br/> Moderate muscle wasting: DM1 &gt; CTL (p=ns)<br/> Severe muscle wasting: DM1 &gt; CTL (p&lt;0.01)</p> <p><u>Semi-quantitative p-PDGFR<math>\beta</math> levels:</u><br/> Moderate muscle wasting: DM1 &lt; CTL (p=ns)<br/> Severe muscle wasting: DM1 &gt; CTL (p&lt;0.05)</p> <p><u>p-PDGFR<math>\beta</math>/Total PDGFR<math>\beta</math> ratio:</u><br/> Moderate muscle wasting: DM1 &lt; CTL (p=ns)<br/> Severe muscle wasting: DM1 &lt; CTL (p&lt;0.05)</p> |
|  |                                                                               | RPPA analysis/Western blot | Stat3         | <p><u>Total Stat3 levels:</u> <b>Increased</b> levels in DM1 vs CTL mice with severe muscle wasting. <b>Similar</b> levels in DM1 vs CTL mice with moderate muscle wasting.</p> <p><u>p-Stat3 levels:</u> <b>Increased</b> levels of p-Stat3 (Ser727) in DM1 vs CTL mice with severe muscle wasting. <b>Reduced</b> levels of p-Stat3 in proportion to total Stat3 levels in DM1 vs CTL mice with severe muscle wasting.</p> <p><u>Semi-quantitative total Stat3 levels:</u><br/> Moderate muscle wasting: DM1 ~ CTL (p=ns)<br/> Severe muscle wasting: DM1 &gt; CTL (p&lt;0.01)</p> <p><u>Semi-quantitative p-Stat3 levels:</u><br/> Moderate muscle wasting: DM1 &gt; CTL (p&lt;0.05)<br/> Severe muscle wasting: DM1 &gt; CTL (p&lt;0.05)</p> <p><u>p-Stat3/Total Stat3 ratio:</u><br/> Moderate muscle wasting: DM1 &gt; CTL (p=ns)<br/> Severe muscle wasting: DM1 &lt; CTL (p&lt;0.05)</p>                                                                  |
|  | <u>DM1:</u> Human skeletal muscle tissue biopsies from patients with DM1: n=7 | Western blot               | AMPK $\alpha$ | <p><u>Total AMPK<math>\alpha</math> levels:</u> <b>Similar</b> levels in DM1 vs CTL.</p> <p><u>p-AMPK<math>\alpha</math> levels:</u> <b>Similar</b> levels of p-AMPK<math>\alpha</math> (Thr172) in DM1 vs CTL</p>                                                                                                                                                                                                                                                                                                                                                                                                                                                                                                                                                                                                                                                                                                                                                |

|                                  |                                                                                                          |                    |               |                                                                                                                                                                                                                                                                                                                                                                                                                                                                                                                     |
|----------------------------------|----------------------------------------------------------------------------------------------------------|--------------------|---------------|---------------------------------------------------------------------------------------------------------------------------------------------------------------------------------------------------------------------------------------------------------------------------------------------------------------------------------------------------------------------------------------------------------------------------------------------------------------------------------------------------------------------|
|                                  | CTL: Human skeletal muscle tissue biopsies from unaffected individuals; n=4                              |                    |               | <p><u>Semi-quantitative total AMPK<math>\alpha</math> levels:</u> DM1 &lt; CTL (p=ns)</p> <p><u>Semi-quantitative p-AMPK<math>\alpha</math> levels:</u> DM1 &gt; CTL (p=ns)</p> <p><u>p-AMPK<math>\alpha</math> /Total AMPK<math>\alpha</math> ratio:</u> DM1 &gt; CTL (p=ns)</p>                                                                                                                                                                                                                                   |
|                                  |                                                                                                          |                    | PDGFR $\beta$ | <p><u>Total PDGFR<math>\beta</math> levels:</u> <b>Increased</b> levels in DM1 vs CTL.</p> <p><u>p-PDGFR<math>\beta</math> levels:</u> <b>Increased</b> levels of p-PDGFR<math>\beta</math> (Tyr751) in DM1 vs CTL.</p> <p><u>Semi-quantitative total PDGFR<math>\beta</math> levels:</u> DM1 &gt; CTL (p&lt;0.001)</p> <p><u>Semi-quantitative p-PDGFR<math>\beta</math> levels:</u> DM1 &gt; CTL (p&lt;0.05)</p> <p><u>p-PDGFR<math>\beta</math>/Total PDGFR<math>\beta</math> ratio:</u> DM1 &lt; CTL (p=ns)</p> |
|                                  |                                                                                                          |                    | Stat3         | <p><u>Total Stat3 levels:</u> <b>Similar</b> levels in DM1 vs CTL.</p> <p><u>p-Stat3 levels:</u> <b>Similar</b> levels of p-Stat3 (Ser727) in DM1 vs CTL</p> <p><u>Semi-quantitative total Stat3 levels:</u> DM1 &gt; CTL (p=ns)</p> <p><u>Semi-quantitative p-Stat3 levels:</u> DM1 &gt; CTL (p=ns)</p> <p><u>p-Stat3/Total Stat3 ratio:</u> DM1 &lt; CTL (p=ns)</p>                                                                                                                                               |
|                                  |                                                                                                          |                    |               |                                                                                                                                                                                                                                                                                                                                                                                                                                                                                                                     |
| Nakamori et al. 2017, Japan [41] | <p>DM1: Mice C2C12 myoblasts with 800 CUGexp RNA</p> <p>CTL: Mice C2C12 myoblasts without CUGexp RNA</p> | Western blot       | IkB $\alpha$  | <p><u>Total IkB<math>\alpha</math> levels:</u> <b>Decreased</b> levels in DM1 vs CTL.</p> <p><u>p-IkB<math>\alpha</math> levels:</u> <b>Increased</b> levels of p-IkB<math>\alpha</math> (Ser32) in DM1 vs CTL.</p> <p><u>Semi-quantitative total IkB<math>\alpha</math> levels:</u> DM1 &lt; CTL (p&lt;0.01)</p> <p><u>Semi-quantitative p-IkB<math>\alpha</math> levels (% to CTL):</u> DM1 &gt; CTL (p&lt;0.01)</p>                                                                                              |
|                                  |                                                                                                          | Western blot/ELISA | NF-kB         | <p><u>Total NF-kB levels:</u> <b>Similar</b> in DM1 vs CTL.</p> <p><u>p-NF-kB levels:</u> <b>Increased</b> levels of p-NF-kB (Ser536) in DM1 vs CTL.</p> <p><u>NF-kB activity:</u> <b>Increased</b> nuclear localization and <b>increased</b> binding activity.</p> <p><u>Semi-quantitative total NF-kB levels:</u> DM1 &gt; CTL (p=ns)</p> <p><u>Semi-quantitative p-NF-kB levels:</u> DM1 &gt; CTL (p&lt;0.01)</p> <p><u>Semi-quantitative Nuclear NF-kB levels:</u> DM1 &gt; CTL (p&lt;0.01)</p>                 |

|                                                  |                                                                                                                                                                                                                                                                                                            |                |             |                                                                                                                                                                                                                                                                                                                                                                                                                                                                                                                  |
|--------------------------------------------------|------------------------------------------------------------------------------------------------------------------------------------------------------------------------------------------------------------------------------------------------------------------------------------------------------------|----------------|-------------|------------------------------------------------------------------------------------------------------------------------------------------------------------------------------------------------------------------------------------------------------------------------------------------------------------------------------------------------------------------------------------------------------------------------------------------------------------------------------------------------------------------|
|                                                  |                                                                                                                                                                                                                                                                                                            |                |             | <u>Semi-quantitative NF-kB binding activity:</u> DM1 > CTL (<p<0.01)                                                                                                                                                                                                                                                                                                                                                                                                                                             |
|                                                  |                                                                                                                                                                                                                                                                                                            | Western blot   | PKR         | <u>Total PKR levels:</u> <b>Similar</b> in DM1 vs CTL.<br><u>p-PKR levels:</u> <b>Increase</b> in p-PKR in DM1 vs CTL.<br><u>Semi-quantitative total PKR levels:</u> DM1 > CTL (p=ns)<br><u>Semi-quantitative p-PKR levels:</u> DM1 > CTL (p<0.01)                                                                                                                                                                                                                                                               |
| <b>Peric et al. 2014, Serbia</b><br>[42]         | <u>jDM1:</u> Human CSF; n=27; Sex: 10F/17M; Age: 35±9.1 (Mean±SD); CTG Repeat Length: 859.2±311.8 (Mean±SD)<br><br><u>aDM1:</u> Human CSF; n=47; Age: 46.7±7.6 (Mean±SD); Sex: 27F/20M; CTG Repeat Length: 703.2±248.0 (Mean±SD)<br><br><u>CTL:</u> Human CSF; n=26; Age: 50.9±8.3 (Mean±SD); Sex: 16F/10M | Sandwich ELISA | Tau         | <u>Total Tau levels:</u> Adult-onset with <b>similar</b> levels of Tau vs CTL and jDM1.<br><br><u>p-tau levels:</u> Adult-onset with <b>slight but not significant increase</b> in p-Tau (Thr181) vs CTL and jDM1.<br><br><u>Quantitative total Tau concentration (Mean±SD):</u><br>jDM1: 175.5±90.2 ng/l vs aDM1: 218.4±108.2 ng/l vs CTL: 178.9±38.6 ng/l (p=0.156)<br><br><u>Quantitative p-tau concentration (Mean±SD):</u><br>jDM1: 43.1±21.0 ng/l vs aDM1: 54.6±23.4 ng/l vs CTL: 47.8±23.7 ng/l (p=0.057) |
| <b>Ravel-Chapuis et al. 2017, Canada</b><br>[43] | <u>DM1:</u> HSA <sup>LR</sup> mice EDL skeletal muscle tissue biopsies; n=4 (n for evaluation of activity=8) CTG repeat length: 250<br><br><u>CTL:</u> HSA <sup>SR</sup> mice EDL skeletal muscle tissue biopsies                                                                                          | Western blot   | Calcineurin | <u>Total Calcineurin levels:</u> <b>Increase</b> in ~2 fold in DM1 vs CTL (p<0.001)<br><br><u>Calcineurin activity:</u> <b>Increase</b> of ~2.5 fold in the phosphatase activity (p<0.001)                                                                                                                                                                                                                                                                                                                       |
| <b>Ravel-Chapuis et al. 2018, Canada</b><br>[44] | <u>DM1:</u> HSA <sup>LR</sup> mice EDL skeletal muscle tissue biopsies; n range= 4-5; CTG repeat length: 250 n range= 4-5<br><br><u>CTL:</u> WT mice EDL skeletal muscle tissue biopsies; n range)= 4-5                                                                                                    | Western blot   | AMPK        | <u>Total AMPK levels:</u> <b>Similar</b> in DM1 vs CTL (p=ns)<br><br><u>p-AMPK levels:</u> <b>Decrease</b> (~70%) in p-AMPK (Thr172) in DM1 vs CTL (p=0.02)<br><br><u>Semi-quantitative total AMPK levels:</u> DM1~CTL (p=ns)<br><u>p-AMPK/Total AMPK ratio:</u> DM1 < CTL (p=0.02)                                                                                                                                                                                                                              |
|                                                  | <u>DM1:</u> Human fibroblast cell line-derived myoblasts with DM1<br><br><u>CTL:</u> Human fibroblast cell line-derived myoblasts                                                                                                                                                                          |                | AMPK        | <u>Total AMPK levels:</u> <b>Similar</b> in DM1 vs CTL.<br><br><u>p-AMPK levels:</u> <b>Decrease</b> (~35%) in p-AMPK (Thr172) in DM1 vs CTL.<br><br><u>Semi-quantitative total AMPK levels:</u> DM1 > CTL (p=ns)                                                                                                                                                                                                                                                                                                |

|                                         |                                                                                                                                                                                                                                       |              |        |                                                                                                                                                                                                                                                                                                                                                                                                                                                                                                                                                                                                                                                                                                                   |
|-----------------------------------------|---------------------------------------------------------------------------------------------------------------------------------------------------------------------------------------------------------------------------------------|--------------|--------|-------------------------------------------------------------------------------------------------------------------------------------------------------------------------------------------------------------------------------------------------------------------------------------------------------------------------------------------------------------------------------------------------------------------------------------------------------------------------------------------------------------------------------------------------------------------------------------------------------------------------------------------------------------------------------------------------------------------|
|                                         |                                                                                                                                                                                                                                       |              |        | p-AMPK/Total AMPK ratio: DM1 < CTL (p=0.02)                                                                                                                                                                                                                                                                                                                                                                                                                                                                                                                                                                                                                                                                       |
| <b>Renna et al. 2017, Italy</b><br>[45] | <u>DM1</u> : Human patients' <i>biceps brachii</i> (BB) (n=4) and <i>tibialis anterior</i> (TA) (n=4) skeletal muscle tissue biopsies<br><br><u>CTL</u> : Healthy participants' BB (n=4) and TA (n=3) skeletal muscle tissue biopsies | Western blot | AKT    | <p><b><i>Biceps brachii</i> (BB)</b><br/> <u>Total AKT levels</u>: <b>Similar</b> levels in DM1 vs CTL.<br/> <u>p-AKT levels</u>: <b>Similar</b> levels of p-AKT (Thr308) in DM1 vs CTL.</p> <p><u>Semi-quantitative total AKT levels</u>: DM1 &gt; CTL (p=ns)<br/> <u>Semi-quantitative p-AKT levels</u>: DM1 &gt; CTL (p=ns)</p> <p><b><i>Tibialis Anterior</i> (TA)</b><br/> <u>Total AKT levels</u>: <b>Increased</b> in DM1 vs CTL.<br/> <u>p-AKT levels</u>: <b>Increased</b> values of p-AKT (Thr308) in DM1 vs CTL.</p> <p><u>Semi-quantitative total AKT levels</u>: DM1 &gt; CTL (p=0.02)<br/> <u>Semi-quantitative p-AKT levels</u>: DM1 &gt; CTL (p=0.04)</p>                                         |
|                                         |                                                                                                                                                                                                                                       |              | ERK1/2 | <p><b><i>Biceps brachii</i> (BB)</b><br/> <u>Total ERK1/2 levels</u>: <b>Increased</b> in DM1 vs CTL.<br/> <u>p-ERK1/2 levels</u>: <b>Similar</b> levels of p-ERK1/2 (Thr202/Tyr204) in DM1 vs CTL.</p> <p><u>Semi-quantitative total ERK1/2 levels</u>: DM1 &gt; CTL (p=0.02)<br/> <u>Semi-quantitative p-ERK1/2 levels</u>: DM1 &gt; CTL (p=ns)</p> <p><b><i>Tibialis Anterior</i> (TA)</b><br/> <u>Total ERK1/2 levels</u>: <b>Increased</b> in DM1 vs CTL.<br/> <u>p-ERK1/2 levels</u>: <b>Increased</b> levels of p-ERK1/2 (Thr202/Tyr204) in DM1 vs CTL</p> <p><u>Semi-quantitative total ERK1/2 levels</u>: DM1 &gt; CTL (p=0.01)<br/> <u>Semi-quantitative p-ERK1/2 levels</u>: DM1 &gt; CTL (p=0.03)</p> |
|                                         |                                                                                                                                                                                                                                       |              | GSK3β  | <p><b><i>Biceps brachii</i> (BB)</b><br/> <u>Total GSK3β levels</u>: <b>Similar</b> values in DM1 vs CTL.<br/> <u>p-GSK3β levels</u>: <b>Similar</b> levels of p-GSK3β (Tyr216) in DM1 vs CTL.</p> <p><u>Semi-quantitative total GSK3β levels</u>: DM1 &gt; CTL (p=ns)<br/> <u>Semi-quantitative p-GSK3β levels</u>: DM1 &gt; CTL (p=ns)</p> <p><b><i>Tibialis Anterior</i> (TA)</b><br/> <u>Total GSK3β values</u>: <b>Decreased</b> in DM1 vs CTL.<br/> <u>p-GSK3β values</u>: <b>Increased</b> levels of p-GSK3β (Tyr216) in DM1 vs CTL.</p>                                                                                                                                                                   |

|  |                                                                                                                                                     |  |       |                                                                                                                                                                                                                                                                                                                                                                                                                                                                                                                                                                                                                                                                                                       |
|--|-----------------------------------------------------------------------------------------------------------------------------------------------------|--|-------|-------------------------------------------------------------------------------------------------------------------------------------------------------------------------------------------------------------------------------------------------------------------------------------------------------------------------------------------------------------------------------------------------------------------------------------------------------------------------------------------------------------------------------------------------------------------------------------------------------------------------------------------------------------------------------------------------------|
|  |                                                                                                                                                     |  |       | <p><u>Semi-quantitative total GSK3<math>\beta</math> levels:</u> DM1 &lt; CTL (p=0.03)<br/> <u>Semi-quantitative p-GSK3<math>\beta</math> levels:</u> DM1 &gt; CTL (p=0.004)</p>                                                                                                                                                                                                                                                                                                                                                                                                                                                                                                                      |
|  |                                                                                                                                                     |  | S6K1  | <p><b><i>Biceps brachii (BB)</i></b><br/> <u>Total S6K1 levels:</u> <b>Similar</b> values in DM1 vs CTL.<br/> <u>p-S6K1 levels:</u> <b>Similar</b> levels of p-S6K1 (Thr421/Ser424) in DM1 vs CTL.</p> <p><u>Semi-quantitative total S6K1 levels:</u> DM1 &lt; CTL (p=ns)<br/> <u>Semi-quantitative p-S6K1 levels:</u> DM1 &gt; CTL (p=ns)</p> <p><b><i>Tibialis Anterior (TA)</i></b><br/> <u>Total S6K1 levels:</u> <b>Similar</b> levels in DM1 vs CTL<br/> <u>p-S6K1 levels:</u> <b>Similar</b> levels values of p-S6K1 (Thr421/Ser424) in DM1 vs CTL</p> <p><u>Semi-quantitative total S6K1 levels:</u> DM1 &gt; CTL (p=ns)<br/> <u>Semi-quantitative p-S6K1 levels:</u> DM1 &gt; CTL (p=ns)</p> |
|  | <p><u>DM1:</u> Human patients satellite cell-derived myotubes; n=5</p> <p><u>CTL:</u> Healthy participants satellite cell-derived myotubes; n=6</p> |  | AKT   | <p><u>p-AKT levels:</u> <b>Slower increase</b> in the activation of AKT (Thr308) <u>upon insulin stimulation</u> in DM1 vs CTL.</p> <p><u>p-AKT/Total AKT ratio:</u><br/> 0 min.: DM1 ~ CTL (p=ns); 5 min.: DM1 &lt; CTL (p=ns)<br/> 15 min.: DM1 &lt; CTL (p=0.04); 30 min.: DM1 &lt; CTL (p=ns)<br/> Between DM1 vs CTL groups: p=0.04</p>                                                                                                                                                                                                                                                                                                                                                          |
|  |                                                                                                                                                     |  | ERK 1 | <p><u>p-ERK 1 levels:</u> <b>Similar</b> levels of p-ERK 1 (Thr202) upon insulin stimulation in DM1 vs CTL.</p> <p><u>p-ERK 1/Total ERK 1 ratio:</u><br/> 0 min.: DM1 ~ CTL (p=ns); 5 min.: DM1 &lt; CTL (p&lt;0.05)<br/> 15 min.: DM1 &lt; CTL (p=ns); 30 min.: DM1 &lt; CTL (p=ns)<br/> Between DM1 vs CTL groups: p=ns</p>                                                                                                                                                                                                                                                                                                                                                                         |
|  |                                                                                                                                                     |  | ERK 2 | <p><u>p-ERK 2 levels:</u> <b>Decreased</b> levels of p-ERK 2 (Tyr204) <u>upon insulin stimulation</u> in DM1 vs CTL.</p> <p><u>p-ERK 2/Total ERK 2 ratio:</u><br/> 0 min.: DM1 ~ CTL (p=ns); 5 min.: DM1 &lt; CTL (p&lt;0.05)<br/> 15 min.: DM1 &lt; CTL (p=ns); 30 min.: DM1 &lt; CTL (p=ns)<br/> Between DM1 vs CTL groups: p=0.05</p>                                                                                                                                                                                                                                                                                                                                                              |

|                                         |                                                                                                                                                                                                                        |              |              |                                                                                                                                                                                                                                                                                                                                                                                                                                                                                                                                                                                                                                                          |
|-----------------------------------------|------------------------------------------------------------------------------------------------------------------------------------------------------------------------------------------------------------------------|--------------|--------------|----------------------------------------------------------------------------------------------------------------------------------------------------------------------------------------------------------------------------------------------------------------------------------------------------------------------------------------------------------------------------------------------------------------------------------------------------------------------------------------------------------------------------------------------------------------------------------------------------------------------------------------------------------|
|                                         |                                                                                                                                                                                                                        |              | GSK3 $\beta$ | <p><u>p-GSK3<math>\beta</math> levels:</u> <b>Not significant but increased</b> levels of p-GSK3<math>\beta</math> (Tyr216) <u>upon insulin stimulation</u> in DM1 vs CTL.</p> <p><u>p-GSK3<math>\beta</math>/Total GSK3<math>\beta</math> ratio:</u><br/> 0 min.: DM1 ~ CTL (p=ns); 5 min.: DM1 &gt; CTL (p=ns)<br/> 15 min.: DM1 &gt; CTL (p=ns); 30 min.: DM1 &gt; CTL (p=ns)<br/> Between DM1 vs CTL groups: p=ns</p>                                                                                                                                                                                                                                |
|                                         |                                                                                                                                                                                                                        |              | IRS1         | <p><u>p-IRS1 levels:</u> <b>No increase</b> in p-IRS1 (Tyr612) <u>upon insulin stimulation</u> in DM1 vs <b>increase</b> in CTL. <b>Not significant but decreased</b> levels of p-IRS1 (Tyr896) in DM1 vs CTL.</p> <p><u>p-IRS1/Total IRS1 (Tyr612) ratio:</u><br/> 0 min.: DM1 ~CTL (p=ns); 5 min.: DM1 &lt; CTL (p=0.002)<br/> 15 min.: DM1 &lt; CTL (p=0.01); 30 min.: DM1 ~CTL (p=ns)<br/> Between DM1 vs CTL groups: p=0.01</p> <p><u>p-IRS1/Total IRS1 (Tyr896) ratio:</u><br/> 0 min.: DM1 ~ CTL (p=ns); 5 min.: DM1 &lt; CTL (p=0.04)<br/> 15 min.: DM1 &lt; CTL (p=0.01); 30 min.: DM1 &lt; CTL (p=ns)<br/> Between DM1 vs CTL groups: p=ns</p> |
|                                         |                                                                                                                                                                                                                        |              | S6K1         | <p><u>p-S6K1 levels:</u> <b>Not significant but decreased</b> levels of p-S6K1 (Thr421/Ser424) <u>upon insulin stimulation</u> in DM1 vs CTL.</p> <p><u>p-S6K1/Total S6K1 ratio:</u><br/> 0 min.: DM1 ~ CTL (p=ns); 5 min.: DM1 &lt; CTL (p=ns)<br/> 15 min.: DM1 &lt; CTL (p=ns); 30 min.: DM1 &lt; CTL (p=ns)<br/> Between DM1 vs CTL groups: p=ns</p>                                                                                                                                                                                                                                                                                                 |
|                                         |                                                                                                                                                                                                                        |              |              |                                                                                                                                                                                                                                                                                                                                                                                                                                                                                                                                                                                                                                                          |
| <b>Renna et al. 2019, Italy</b><br>[46] | <u>DM1:</u> Human patients' <i>biceps brachii</i> (BB) and <i>tibialis anterior</i> (TA) skeletal muscle tissue biopsies (n=8)<br><br><u>CTL:</u> Healthy participants BB and TA skeletal muscle tissue biopsies (n=6) | Western blot | AKT          | <p><u>p-AKT levels:</u> <b>Decreased activation</b> of AKT (Thr308/Ser473) <u>upon insulin stimulation</u> in DM1 vs CTL.</p> <p><u>p-AKT fold change on basal level (Thr308):</u> DM1 &lt; CTL (p&lt;0.01)</p> <p><u>p-AKT fold change on basal level (Ser473):</u> DM1 &lt; CTL (p&lt;0.01)</p>                                                                                                                                                                                                                                                                                                                                                        |
|                                         |                                                                                                                                                                                                                        |              | AS160        | <p><u>p-AS160 levels:</u> <b>Decreased</b> levels of p-AS160 (Thr642) <u>upon insulin stimulation</u> in DM1 vs CTL.</p> <p><u>p-AS160 fold change on basal level:</u> DM1 &lt; CTL (p&lt;0.01)</p>                                                                                                                                                                                                                                                                                                                                                                                                                                                      |
|                                         |                                                                                                                                                                                                                        |              | ERK 1/2      | <p><u>p-ERK 1/2 levels:</u> <b>Decreased</b> levels of p-ERK 1/2 (Thr202/Tyr204) <u>upon insulin stimulation</u> in DM1 vs CTL.</p>                                                                                                                                                                                                                                                                                                                                                                                                                                                                                                                      |

|                                                 |                                                                                                                                                                                                        |              |       |                                                                                                                                                                                                                                                                                                                                                                                            |
|-------------------------------------------------|--------------------------------------------------------------------------------------------------------------------------------------------------------------------------------------------------------|--------------|-------|--------------------------------------------------------------------------------------------------------------------------------------------------------------------------------------------------------------------------------------------------------------------------------------------------------------------------------------------------------------------------------------------|
|                                                 |                                                                                                                                                                                                        |              |       | <u>p-ERK1/2 fold change on basal level:</u> DM1 < CTL (p<0.01)                                                                                                                                                                                                                                                                                                                             |
|                                                 |                                                                                                                                                                                                        |              | FOXO1 | <u>p-FOXO1 levels:</u> <b>Decreased</b> levels of p-FOXO1 (Thr24) <u>upon insulin stimulation</u> in DM1 vs CTL.                                                                                                                                                                                                                                                                           |
|                                                 |                                                                                                                                                                                                        |              | IRS1  | <u>p-FOXO1 fold change on basal level:</u> DM1 < CTL (p<0.01)<br><u>p-IRS1:</u> <b>Decreased</b> levels of p-IRS1 (Tyr612) <u>upon insulin stimulation</u> in DM1 vs in CTL.                                                                                                                                                                                                               |
|                                                 |                                                                                                                                                                                                        |              | mTOR  | <u>p-IRS1 fold change on basal level:</u> DM1 < CTL (p<0.0001)<br><u>p-mTOR:</u> <b>Decreased</b> levels of p-mTOR (Ser2448) <u>upon insulin stimulation</u> in DM1 vs CTL.                                                                                                                                                                                                                |
|                                                 |                                                                                                                                                                                                        |              | S6K1  | <u>p-mTOR fold change on basal level:</u> DM1 < CTL (p<0.01)<br><u>p-S6K1:</u> <b>Decreased</b> levels of p-S6K1 (Thr421/Ser424) <u>upon insulin stimulation</u> in DM1 vs CTL<br><br><u>p-S6K1 fold change on basal level:</u> DM1 < CTL (p<0.05)                                                                                                                                         |
| <b>Rizzo et al. 2018, Italy</b><br>[47]         | <u>DM1:</u> Human fetus-derived congenital DM1 myoblasts and myotubes; n=2; CDM13 CTG repeat length: 1800; CDM15 CTG repeat length: 3200<br><br><u>CTL:</u> Human fetus-derived myoblasts and myotubes | Western blot | AKT   | <u>Total AKT levels:</u> <b>Significantly decreased</b> levels in CDM15 vs CTL in day 0 of differentiation. <b>Similar</b> levels in CDM13 vs CTL in day 0 of differentiation.<br><br><u>Semi-quantitative total AKT levels:</u> CDM13 < CTL (p=ns); CDM15 < CTL (p<0.05)                                                                                                                  |
|                                                 |                                                                                                                                                                                                        |              | S6K1  | <u>p-S6K1 levels:</u> <b>Decreased</b> levels of p-S6K1 (Thr421/Ser424) at day 0 and day 3 of differentiation in DM1 (CDM15) vs CTL. However, there was an <b>increase</b> of p-S6K1 (Thr421/Ser424) at day 0 and day 3 of differentiation in DM1 (CDM13) vs CTL.<br><br><u>Semi-quantitative p-S6K1 levels:</u><br><u>d0:</u> CDM15 < CDM13 > CTL; <u>d3:</u> CDM15 < CDM13 > CTL (p: NR) |
| <b>Sabater-arcis et al. 2020, Spain</b><br>[48] | <u>DM1:</u> Human fibroblast-derived myotubes with scrambled oligonucleotides; CTG repeat length: 1300<br><br><u>CTL:</u> Human fibroblast-derived myotubes with scrambled oligonucleotides            | Western blot | AKT   | <u>p-AKT levels:</u> <b>Decreased</b> levels of p-AKT (Ser473) in DM1 vs CTL.<br><br><u>p-AKT/Total AKT ratio:</u><br>DM1: 0.910 ± 0.127 (Mean±SEM); CTL: 1.861 ± 0.140 (Mean±SEM) (p: NR)                                                                                                                                                                                                 |
|                                                 |                                                                                                                                                                                                        |              | AMPK  | <u>p-AMPK levels:</u> <b>Similar</b> levels of p-AMPK (Thr172) in DM1 and CTL.<br><br><u>p-AMPK/Total AMPK ratio:</u><br>DM1: 0.7906±0.1316 (Mean±SEM); CTL: 0.5272±0.1316 (Mean±SEM) (p: NR)                                                                                                                                                                                              |



|                                   |                                                                                                         |                                      |        |                                                                                                                                                                                                                                                                 |
|-----------------------------------|---------------------------------------------------------------------------------------------------------|--------------------------------------|--------|-----------------------------------------------------------------------------------------------------------------------------------------------------------------------------------------------------------------------------------------------------------------|
| Salisbury et al. 2008, USA [49]   | DM1: human patients' primary myoblasts and myotubes                                                     | Western blot<br>EMSA assay           | AKT    | Total AKT levels: <b>Similar</b> levels in DM1 vs CTL (p: NR)                                                                                                                                                                                                   |
|                                   | CTL: human primary myoblasts and myotubes                                                               |                                      | CDK4   | p-AKT levels: <b>Increased</b> levels of p-AKT (Ser473) in the cytoplasm of DM1 vs CTL proliferating myoblasts. <b>Decreased</b> levels in DM1 vs CTL differentiating myotubes. (p: NR)                                                                         |
|                                   |                                                                                                         |                                      | CUGBP1 | AKT activity: <b>Increased</b> interaction with CUGBP1 in DM1 vs CTL myoblasts. (p: NR)                                                                                                                                                                         |
| Salvatori et al. 2005, Italy [50] | DM1: Human patients skeletal muscle tissue biopsies; n=16                                               | Immunohistochemistry<br>Western blot | DMPK   | Total CDK4 levels: <b>Increased</b> levels in CTL differentiating myotubes, while levels remain <b>unchanged</b> in DM1 during differentiation. (p: NR)                                                                                                         |
|                                   | CTL: Healthy participants skeletal muscle tissue biopsies; n=6                                          |                                      |        | Total CUGBP1 levels: <b>Decreased</b> levels in DM1 differentiating myotubes vs proliferating myoblasts. In CTL, CUGBP1 is <b>increased</b> in differentiating myotubes. (p: NR)                                                                                |
| Song et al. 2020, China [51]      | DM1: IPSC-derived satellite skeletal muscle cells (n=2) (DM1-03, DM1-13-3)                              | Western Blot                         | mTOR   | p-CUGBP1 levels: <b>Increased</b> levels of p-CUGBP1 (Ser28) in DM1 vs CTL proliferating myoblasts. <b>Decreased</b> levels of p-CUGBP1 (Ser302) in DM1 vs CTL differentiating myotubes (p: NR)                                                                 |
|                                   | CTL: IPSC-derived satellite skeletal muscle cells (n=1)                                                 |                                      |        | CUGBP1 activity: <b>Decreased</b> formation of CUGBP1-eIF2 complex during differentiation in DM1 vs CTL <b>Increased</b> interaction with Cyclin D1 mRNA in DM1 vs CTL myoblasts and myotubes. <b>Decreased</b> interaction with cyclin D3 in myotubes. (p: NR) |
| Wang et al. 2009, USA [52]        | DM1: Human patients satellite skeletal muscle cells; n=3; Sex: 1M/2F; Age: 46±2 y (mean ± SD)           | 2D Gel/ Western Blot                 | CUGBP1 | Total DMPK levels: <b>Decreased</b> levels in DM1 vs CTL.                                                                                                                                                                                                       |
|                                   | CTL: Healthy participants satellite skeletal muscle cells; n=3; Sex: 2M/1F; Age: 48±3 years (mean ± SD) |                                      |        | Semi-quantitative total DMPK levels (fold change):<br>DM1: 1.96±0.24 (Mean±SEM) vs CTL: 3.62±0.69 (Mean±SEM) (p=0.004)                                                                                                                                          |
| Wang et al. 2009, USA [52]        | DM1: TAM+EpA960 RNA mice heart tissue                                                                   | 2D Gel/ Western Blot                 | CUGBP1 | p-mTOR levels: <b>Decreased</b> levels of p-mTOR (Ser2448) in DM1 vs CTL                                                                                                                                                                                        |
|                                   |                                                                                                         |                                      |        | p-mTOR/Total mTOR relative expression: DM1-03 < DM1-13-3 < CTL: 1.0 (p<0.05)                                                                                                                                                                                    |
| Wang et al. 2009, USA [52]        | DM1: TAM+EpA960 RNA mice heart tissue                                                                   | 2D Gel/ Western Blot                 | CUGBP1 | p-mTOR levels: <b>Decreased</b> levels of p-mTOR (Ser2448) in DM1 vs CTL                                                                                                                                                                                        |
|                                   |                                                                                                         |                                      |        | p-mTOR/Total mTOR relative expression: DM1 < CTL (p<0.05)                                                                                                                                                                                                       |
| Wang et al. 2009, USA [52]        | DM1: TAM+EpA960 RNA mice heart tissue                                                                   | 2D Gel/ Western Blot                 | CUGBP1 | Total CUGBP1 levels: <b>Increased</b> in DM1 vs CTL. (p: NR)                                                                                                                                                                                                    |
|                                   |                                                                                                         |                                      |        | p-CUGBP1 levels: <b>Increased</b> phosphorylation levels of p-CUGBP1 in DM1. (p: NR)                                                                                                                                                                            |

|                                                     |                                                                                                                                                                              |                                           |          |                                                                                                                                       |
|-----------------------------------------------------|------------------------------------------------------------------------------------------------------------------------------------------------------------------------------|-------------------------------------------|----------|---------------------------------------------------------------------------------------------------------------------------------------|
|                                                     | <u>CTL</u> : MCM mice heart tissue                                                                                                                                           |                                           | PKCα/βII | <u>p-PKCα/βII levels</u> : <b>Increased</b> levels of p-PKC (Thr638/Thr641) in DM1 vs CTL. (p: NR)                                    |
| <b>Wang et al. 2019, Taiwan</b><br>[53]             | <u>DM1</u> : DMSXL mice brain tissue; CTG repeat length: >1000 CUG                                                                                                           | Western blot                              | CUGBP1   | <u>p-CUGBP1 levels</u> : <b>Decreased</b> levels of p-CUGBP1 (Ser302) in DM1 vs CTL. (p: NR)                                          |
|                                                     | <u>CTL</u> : WT mice brain tissue                                                                                                                                            |                                           | GSK3β    | <u>Total GSK3β levels</u> : <b>Increased</b> in DM1 vs CTL. (p: NR)                                                                   |
|                                                     | <u>DM1</u> : DMSXL adult mice diaphragm muscle tissue biopsies; CTG repeat length: >1000 CUGexp RNA                                                                          |                                           |          |                                                                                                                                       |
|                                                     | <u>CTL</u> : WT mice diaphragm muscle tissue biopsies                                                                                                                        |                                           | GSK3β    | <u>Total GSK3β levels</u> : <b>Increased</b> in DM1 vs CTL. (p: NR)                                                                   |
| <b>González-Barriga et al. 2021, France</b><br>[54] | <u>DM1</u> : Human congenital DM1 myoblasts; n=3; CTG Repeat Length: ~2000                                                                                                   | Mass-spectrometry<br>2D Gel/ Western Blot | Capzb    | <u>p-CAPZB levels</u> : <b>Increased</b> levels of p-CAPZB (Ser 263) in DM1 vs CTL (fold change: 2.778; p = 0.0089)                   |
|                                                     | <u>CTL</u> : Healthy participants' myoblasts; n=3                                                                                                                            |                                           |          |                                                                                                                                       |
| <b>Panaite et al. 2011, Switzerland</b><br>[55]     | <u>DM1</u> : DMSXL mice primary oligodendrocytes                                                                                                                             | Immunohistochemistry                      | Tau      | <u>Total Tau levels</u> : <b>Decreased</b> in DM1 vs CTL. (p: NR)                                                                     |
|                                                     | <u>CTL</u> : WT mice primary spinal cord                                                                                                                                     |                                           |          | <u>p-Tau levels</u> : <b>Increased</b> phosphorylation levels of p-Tau (Ser 396, Ser 404, Ser 199 and Ser 202) in DM1 vs CTL. (p: NR) |
| <b>Takahashi et al. 2001, Japan</b><br>[56]         | <u>DM1</u> : COS-7 cells transiently expressing mutant DMPK (CTG) <sub>130</sub> cDNA<br><br><u>CTL</u> : COS-7 cells transiently expressing WT DMPK (CTG) <sub>5</sub> cDNA | Western blot                              | DMPK     | <u>Total DMPK levels</u> : <b>Decreased</b> levels in DM1 vs CTL in 20-30% (p<0.05).                                                  |
| <b>Fu et al. 1993, USA</b><br>[57]                  | <u>DM1</u> : Human adult DM1 patients skeletal muscle tissue biopsies; n=20<br><br><u>CTL</u> : Human normal adult skeletal muscle tissue biopsies; n=7                      | Western Blot                              | DMPK     | <u>Total DMPK levels</u> : <b>Decreased</b> levels in DM1 vs CTL. (p: NR)                                                             |

|                                            |                                                                                                                                                                          |                              |       |                                                                                                                                                                                                                                                   |
|--------------------------------------------|--------------------------------------------------------------------------------------------------------------------------------------------------------------------------|------------------------------|-------|---------------------------------------------------------------------------------------------------------------------------------------------------------------------------------------------------------------------------------------------------|
| <b>Furling et al. 2001, Canada</b><br>[58] | <u>DM1</u> : primary human DM1 skeletal muscle cell culture<br><br><u>CTL</u> : primary human normal skeletal muscle cell culture                                        | Western Blot                 | DMPK  | <u>Total DMPK levels</u> : <b>Decreased</b> levels in DM1 vs CTL. (p: NR)                                                                                                                                                                         |
| <b>Koga et al. 1994, Japan</b><br>[59]     | <u>DM1</u> : Human adult DM1 patients skeletal muscle tissue biopsies; n=14<br><br><u>CTL</u> : Human normal adult skeletal muscle tissue biopsies; n=NR                 | Western Blot                 | DMPK  | <u>Total DMPK levels</u> : <b>Decreased</b> levels in DM1 vs CTL in about 36±36.9% (p: NR).                                                                                                                                                       |
| <b>Usuki et al. 2000, Japan</b><br>[60]    | <u>DM1</u> : C2C12 cells stably expressing mutant DMPK (CTG) <sub>160</sub> cDNA<br><br><u>CTL</u> : C2C12 cells stably expressing WT DMPK (CTG) <sub>5</sub> cDNA       | Western Blot                 | c-Jun | <u>Total c-Jun levels</u> : <b>Similar</b> in DM1 vs CTL upon MeHg-induced cytotoxicity. (p: NR)<br><br><u>p-c-Jun levels</u> : <b>Increased</b> phosphorylation levels of p-c-Jun (Ser 63) in DM1 vs CTL upon MeHg-induced cytotoxicity. (p: NR) |
|                                            |                                                                                                                                                                          |                              | Elk1  | <u>p-Elk1 levels</u> : <b>Decreased</b> phosphorylation levels of p-Elk1 (Ser 383) in DM1 vs CTL upon MeHg-induced cytotoxicity. (p: NR)                                                                                                          |
| <b>Timchenko et al. 2001, USA</b><br>[61]  | <u>DM1</u> : human DM1 skeletal muscle cells<br><br><u>CTL</u> : human normal skeletal muscle cells                                                                      | Western Blot<br>Kinase assay | Cdk4  | <u>Total Cdk4 levels</u> : <b>Similar</b> in DM1 vs CTL during myoblasts differentiation. (p: NR)<br><br><u>Cdk4 activity</u> : <b>Increased</b> in DM1 vs CTL during myoblasts differentiation. (p: NR)                                          |
| <b>Narang et al. 2000, Canada</b><br>[62]  | <u>DM1</u> : Human adult DM1 patients skeletal muscle tissue biopsies; n=4<br><br><u>CTL</u> : Human adult age-matched control skeletal muscle tissue biopsies; n=4      | Western Blot                 | DMPK  | <u>Total DMPK levels</u> : Significantly <b>Decreased</b> in DM1 vs CTL. (p<0.005)                                                                                                                                                                |
|                                            | <u>DM1</u> : Human post-mortem congenital DM1 patients skeletal muscle tissue; n=4<br><br><u>CTL</u> : Human post-mortem age-matched control skeletal muscle tissue; n=4 |                              |       | <u>Total DMPK levels</u> : <b>Similar</b> in DM1 vs CTL. (p: NR)                                                                                                                                                                                  |
| <b>Hernandez-Hernandez et</b>              | <u>DM1</u> : PC12 cells stably expressing mutant DMPK (CTG) <sub>190</sub> cDNA                                                                                          | Western Blot                 | Tau   | <u>Total Tau levels</u> : Slightly but significantly <b>Decreased</b> in DM1 vs CTL. (p<0.05)                                                                                                                                                     |

|                             |                                                                      |  |  |                                                                                                                                    |
|-----------------------------|----------------------------------------------------------------------|--|--|------------------------------------------------------------------------------------------------------------------------------------|
| al. 2006,<br>Mexico<br>[63] | CTL: PC12 cells stably expressing WT<br>DMPK (CTG) <sub>5</sub> cDNA |  |  | p-Tau levels: Significantly <b>Increased</b> phosphorylation levels of p-Tau (Ser 396, Ser 404 and Thr231) in DM1 vs CTL. (p<0.05) |
|-----------------------------|----------------------------------------------------------------------|--|--|------------------------------------------------------------------------------------------------------------------------------------|

**Abbreviations:** **aDM1** – Adult phenotype; **AKT** - Protein kinase B; **AMPK** - 5' AMP-activated protein kinase; **AS160** - TBC1 domain family member 4; **CaMKII $\beta$ M** - Ca<sup>2+</sup>/calmodulin dependent protein kinase; **Capzb** - F-actin-capping protein subunit beta; **CDKN1B** - Cyclin-dependent kinase inhibitor 1B; **CDK4** – Cyclin-dependent kinase 4; **CDK6** - Cyclin-dependent kinase 6; **CHO-tTA** – chinese hamster ovary cells transfected with the TRE-GFP-CTG<sub>914</sub> plasmid; **CSF** - Cerebrospinal fluid; **CTG** – Cytosine-Thymine-Guanine triplet; **CTL** – Control or Wild-type group; **CUGBP1** - CUG triplet repeat RNA binding protein 1; **CUGexp** – Expanded CUG; **DMPK** - Dystrophia myotonica protein kinase; **DMSXL** - Transgenic mice carrying >1,000 CTG repeats; **DM1**- Myotonic Dystrophy type 1 model group; **DM5 mice** - RNA toxicity model; **Dox** – Doxycycline; **dp-protein** - dephosphorylated protein; **d0** – Before exposure to differentiating medium; **d2/d3/d4/d6** – 2/3/4/6 days after exposure to differentiation medium; **EDL** - Extensor digitorum longus muscle; **eIF2 $\alpha$**  - Eukaryotic translation initiation factor 2 subunit 1; **EpA960** – interrupted 960-CTG expansion model; **ERK 1/2** - Extracellular signal-regulated kinases 1/2; **Fed** – Mice food deprived for 12 hours followed by 4 hours of free access to food before sacrifice; **FOXO1** - Forkhead box protein O1; **GSK3** - Glycogen synthase kinase 3; **HSA<sup>LR</sup>** - Transgenic mice expressing the human skeletal actin gene with long CUG repeat Length; **HSA<sup>SR</sup>** - Transgenic mice expressing the human skeletal actin gene with short CUG repeat Length; **IGF-1** - Insulin-like growth factor 1; **I $\kappa$ B $\alpha$**  - Nuclear factor of kappa light polypeptide gene enhancer in B-cells inhibitor, alpha; **INPP4B** - Type II inositol 3,4-bisphosphate 4-phosphatase; **InsR** – Insulin Receptor; **IRS1** – Insulin Receptor Substrate 1; **jDM1** – Childhood/juvenile phenotype; **LBCLs** - Lymphoblastoid cell lines; **LKB1** - Liver kinase B1; **MCM** - MerCreMer (MCM) model; **MEK** - Mitogen-activated protein kinase kinase; **MeHg** – Methylmercury chloride; **mTOR** - Mammalian target of rapamycin; **n** – sample size; **n.d.** - not detected; **NF- $\kappa$ B** - Nuclear factor kappa-light-chain-enhancer of activated B cells; **PDGFR $\beta$**  - Platelet-derived growth factor receptor beta; **PERK** - Protein kinase R (PKR)-like endoplasmic reticulum kinase; **PKC** – Protein Kinase C; **PKM2** - Pyruvate kinase isozyme M2; **PKR** - Protein kinase R; **PLN** – Phospholamban; **p-protein** - phosphorylated protein; **PRKAR1B** - cAMP-dependent protein kinase type I-beta regulatory subunit; **p-state** - phosphorylation state; **PTPRF** - Receptor-type tyrosine-protein phosphatase F; **p38MAPK** - p38 Mitogen-activated protein kinase; **Rb** – Retinoblastoma protein; **RpS6** – Ribosomal protein S6; **SEM** - Standard error of the mean; **Stat3** - Signal transducer and activator of transcription 3; **S6K1** - Ribosomal protein S6 kinase beta-1; **TAK1** - Mitogen-activated protein kinase kinase kinase 7; **TAM** - Tamoxifen-inducible and heart-specific EpA960(R) RNA expression model; **TREDT960I** - Tetracycline-inducible transgene model; **TSC2** - Tuberous Sclerosis Complex 2; **ULK1** - Unc-51 like autophagy activating kinase; **WT** – Wildtype; **24hStarved/45hStarved** – Mice with 24/45 hours of food deprivation but free access to water before sacrifice.
